# Supplementary material for: Exploring the Solubility Limits of Edaravone in Neat Solvents and Binary Mixtures: Experimental and Machine Learning Study
Source: Preprints.org preprint supplement (doi:10.20944/preprints202308.1780.v1), 2023-08-28

## Supplementary Materials

### Exploring the solubility limits of Edaravone in neat solvents and binary mixtures: experimental and machine learning study

Maciej Przybyłek, Tomasz Jeliński, Magdalena Mianowana, Kinga Misiak, Piotr Cysewski  
Department of Physical Chemistry, Pharmacy Faculty, Collegium Medicum of Bydgoszcz, Nicolaus Copernicus University in Toruń, Kurpińskiego 5, 85-096 Bydgoszcz, Poland

#### Table of Contents

|                                                                                                                                                                                                                                                                                                                                                                                                                                               |    |
|-----------------------------------------------------------------------------------------------------------------------------------------------------------------------------------------------------------------------------------------------------------------------------------------------------------------------------------------------------------------------------------------------------------------------------------------------|----|
| S1. New edaravone solubility data.....                                                                                                                                                                                                                                                                                                                                                                                                        | 2  |
| Table S1.1. The experimentally determined mole fraction solubility of Edaravone ( $x_{\text{EDA}}$ , $\cdot 10^2$ ) in diglyme (DIG), triglyme (TIG), tetraglyme (TEG), dimethyl sulfoxide (DMSO), 1-methyl-2-pyrrolidone, (NMP), 4-formylmorpholine (4FM), and 2,4-dimethylphenol (DMP) at various temperatures. Standard deviation values are given in parentheses. ....                                                                    | 2  |
| Table S1.2. The experimentally determined mole fraction solubility of Edaravone ( $x_{\text{EDA}}$ , $\cdot 10^2$ ) in 1,2-propanediol (PG), diethylene glycol (DG), triethylene glycol (TG), and 1,3-butanediol (BG), as well as in their aqueous binary mixtures at 25 °C. In the first column, $x_2^*$ denotes the mole fraction of the organic solvent in solute-free solutions. Standard deviation values are given in parentheses. .... | 2  |
| Figure S1.3. The DSC (A) and FTIR-ATR (B) characteristics of the solid residues obtained after shake-flask solubility determination procedure. Notation is the same as in Table S1.1. and S1.2. 3                                                                                                                                                                                                                                             |    |
| S2. Solubility data curation.....                                                                                                                                                                                                                                                                                                                                                                                                             | 4  |
| S2.1. Collection of EDA solubility in neat solvents .....                                                                                                                                                                                                                                                                                                                                                                                     | 4  |
| Table S2.1. Optimized values of model parameters used for data curation along with statistical measure of the fitting accuracy.....                                                                                                                                                                                                                                                                                                           | 4  |
| Figure S2.1. Graphical illustration of the solubility data curation of edaravone in neat solvents. The black diamonds represent curated values constituting the solubility dataset, while gray symbols characterize experimental points ([a], [b], [c] taken from references 18, 16, 17, respectively as cited in main text).....                                                                                                             | 7  |
| S2.2. Binary solvents mixtures .....                                                                                                                                                                                                                                                                                                                                                                                                          | 7  |
| Table S2.2. Solubility data curation of edaravone in binary solvents. All experimental data come from reference 18 as cited in main text or from this work. ....                                                                                                                                                                                                                                                                              | 7  |
| S3. Regressor models characteristics .....                                                                                                                                                                                                                                                                                                                                                                                                    | 15 |
| Table S3.1. Graphical illustration of the of the regression model performance belonging to set A. The panels a,b, and c document the correlation between computed and consensus solubility values with annotation of the standard deviation as circles radius, applicability domain plots, and results of learning curve analysis concerning both R2 and MAE, respectively. ....                                                              | 15 |
| Table S3.2. Graphical illustration of the of the regression model performance belonging to set B. The panels a,b, and c document the correlation between computed and consensus solubility values with annotation of the standard deviation as circles radius, applicability domain plots, and results of learning curve analysis concerning both R2 and MAE, respectively. ....                                                              | 18 |

## S1. New edaravone solubility data

**Table S1.1.** The experimentally determined mole fraction solubility of Edaravone ( $x_{\text{EDA}}$ ,  $\cdot 10^2$ ) in diglyme (DIG), triglyme (TIG), tetraglyme (TEG), dimethyl sulfoxide (DMSO), 1-methyl-2-pyrrolidone, (NMP), 4-formylmorpholine (4FM), and 2,4-dimethylphenol (DMP) at various temperatures. Standard deviation values are given in parentheses.

| solvent | Edaravone solubility ( $x_{\text{EDA}}$ , $\cdot 10^2$ ) |                      |                      |                      |
|---------|----------------------------------------------------------|----------------------|----------------------|----------------------|
|         | 25 °C                                                    | 30 °C                | 35 °C                | 40 °C                |
| DMSO    | 7.58 ( $\pm 0.32$ )                                      | 12.25 ( $\pm 0.16$ ) | 20.1 ( $\pm 0.15$ )  | 29.81 ( $\pm 1.14$ ) |
| TEG     | 4.63 ( $\pm 0.05$ )                                      | 8.63 ( $\pm 0.22$ )  | 13.05 ( $\pm 0.19$ ) | 21.21 ( $\pm 0.64$ ) |
| NMP     | 3.83 ( $\pm 0.01$ )                                      | 4.96 ( $\pm 0.49$ )  | 6.94 ( $\pm 0.19$ )  | 8.61 ( $\pm 0.21$ )  |
| DIG     | 2.05 ( $\pm 0.02$ )                                      | 2.69 ( $\pm 0.04$ )  | 3.33 ( $\pm 0.11$ )  | 4.16 ( $\pm 0.06$ )  |
| DMP     | 1.88 ( $\pm 0.05$ )                                      | 2.82 ( $\pm 0.58$ )  | 4.08 ( $\pm 0.21$ )  | 5.65 ( $\pm 0.25$ )  |
| TIG     | 1.53 ( $\pm 0.07$ )                                      | 2.20 ( $\pm 0.04$ )  | 3.11 ( $\pm 0.17$ )  | 4.57 ( $\pm 0.39$ )  |
| 4FM     | 1.11 ( $\pm 0.01$ )                                      | 1.46 ( $\pm 0.08$ )  | 1.76 ( $\pm 0.19$ )  | 2.17 ( $\pm 0.01$ )  |

**Table S1.2.** The experimentally determined mole fraction solubility of Edaravone ( $x_{\text{EDA}}$ ,  $\cdot 10^2$ ) in 1,2-propanediol (PG), diethylene glycol (DG), triethylene glycol (TG), and 1,3-butanediol (BG), as well as in their aqueous binary mixtures at 25 °C. In the first column,  $x_2^*$  denotes the mole fraction of the organic solvent in solute-free solutions. Standard deviation values are given in parentheses.

| $x_2^*$ | Edaravone solubility ( $x_{\text{EDA}}$ , $\cdot 10^2$ ) |                       |                       |                       |
|---------|----------------------------------------------------------|-----------------------|-----------------------|-----------------------|
|         | PG                                                       | DG                    | TG                    | BG                    |
| 0.0     | 0.02 ( $< \pm 0.01$ )                                    | 0.02 ( $< \pm 0.01$ ) | 0.02 ( $< \pm 0.01$ ) | 0.02 ( $< \pm 0.01$ ) |
| 0.1     | 0.06 ( $\pm 0.01$ )                                      | 0.09 ( $\pm 0.01$ )   | 0.31 ( $\pm 0.04$ )   | 0.12 ( $\pm 0.02$ )   |
| 0.2     | 0.15 ( $\pm 0.01$ )                                      | 0.25 ( $\pm 0.01$ )   | 0.78 ( $\pm 0.03$ )   | 0.29 ( $\pm 0.04$ )   |
| 0.3     | 0.26 ( $\pm 0.02$ )                                      | 0.48 ( $\pm 0.04$ )   | 1.28 ( $\pm 0.07$ )   | 0.53 ( $\pm 0.03$ )   |
| 0.4     | 0.40 ( $\pm 0.02$ )                                      | 0.74 ( $\pm 0.03$ )   | 1.72 ( $\pm 0.06$ )   | 0.83 ( $\pm 0.04$ )   |
| 0.5     | 0.54 ( $\pm 0.02$ )                                      | 1.09 ( $\pm 0.01$ )   | 2.11 ( $\pm 0.08$ )   | 1.07 ( $\pm 0.05$ )   |
| 0.6     | 0.71 ( $\pm 0.02$ )                                      | 1.39 ( $\pm 0.02$ )   | 2.54 ( $\pm 0.08$ )   | 1.27 ( $\pm 0.03$ )   |
| 0.7     | 0.86 ( $\pm 0.02$ )                                      | 1.65 ( $\pm 0.05$ )   | 3.03 ( $\pm 0.09$ )   | 1.42 ( $\pm 0.05$ )   |
| 0.8     | 0.99 ( $\pm 0.02$ )                                      | 1.87 ( $\pm 0.04$ )   | 3.51 ( $\pm 0.09$ )   | 1.50 ( $\pm 0.03$ )   |
| 0.9     | 1.00 ( $\pm 0.02$ )                                      | 1.98 ( $\pm 0.02$ )   | 3.58 ( $\pm 0.06$ )   | 1.51 ( $\pm 0.04$ )   |
| 1.0     | 0.85 ( $\pm 0.01$ )                                      | 2.04 ( $\pm 0.06$ )   | 2.75 ( $\pm 0.08$ )   | 1.43 ( $\pm 0.04$ )   |

A

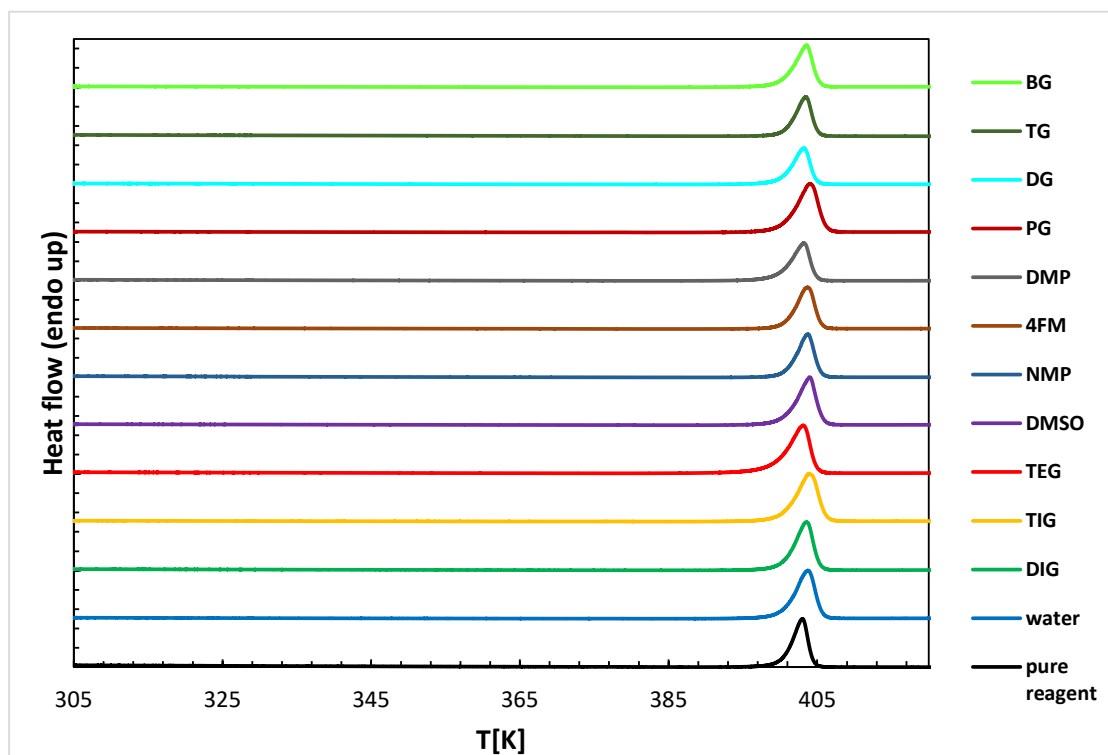

B

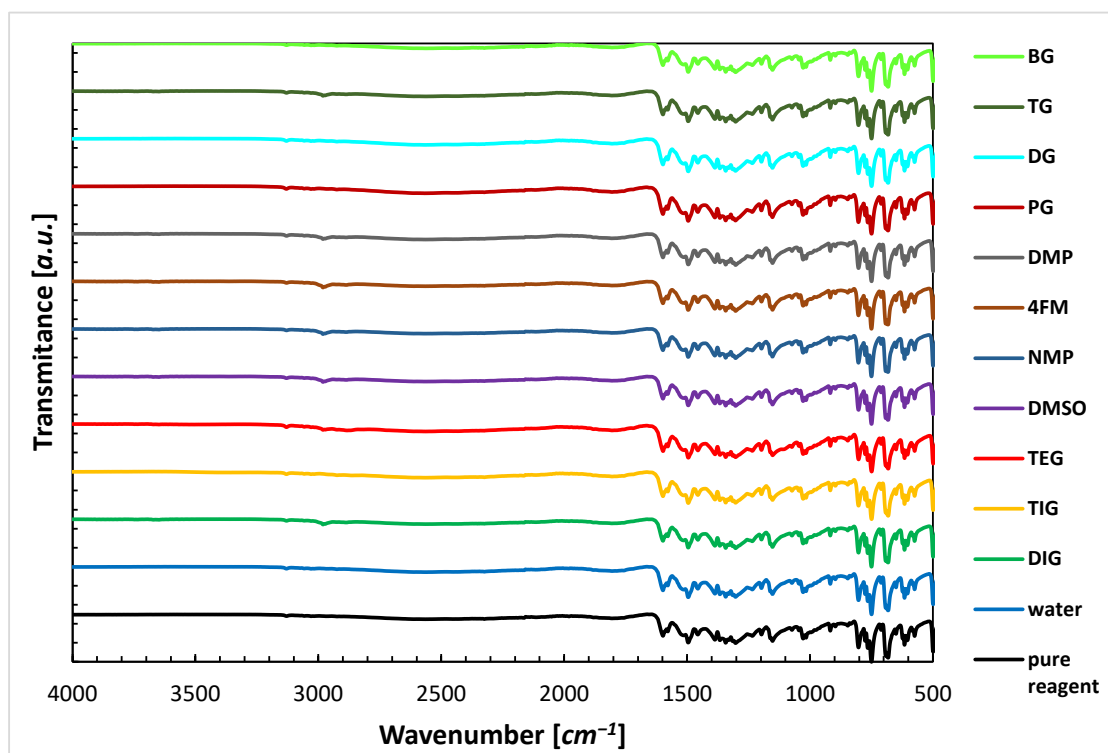

**Figure S1.3.** The DSC (A) and FTIR-ATR (B) characteristics of the solid residues obtained after shake-flask solubility determination procedure. Notation is the same as in Table S1.1. and S1.2.

## S2. Solubility data curation

### S2.1. Collection of EDA solubility in neat solvents

**Table S2.1.** Optimized values of model parameters used for data curation along with statistical measure of the fitting accuracy.

| solvent                | acronim | A·10 <sup>3</sup> | B·10 <sup>3</sup> | C·10 <sup>3</sup> | RMSD·10 <sup>3</sup> | MAPE |
|------------------------|---------|-------------------|-------------------|-------------------|----------------------|------|
| water                  | W       | 3.111             | -6.398            | 0.858             | 4.03                 | 0.04 |
| methanol               | MeOH    | 31.984            | -17.949           | 2.185             | 165.47               | 4.19 |
| ethanol                | EtOH    | 20.389            | -11.949           | 1.439             | 68.09                | 1.33 |
| n-propanol             | nPrOH   | 29.274            | -17.128           | 2.198             | 133.95               | 2.51 |
| isopropanol            | iPrOH   | 18.599            | -10.825           | 1.246             | 90.26                | 1.90 |
| n-butanol              | nBuOH   | 15.486            | -8.444            | 0.834             | 8.89                 | 0.24 |
| isobutanol             | iBuOH   | 21.045            | -11.898           | 1.348             | 18.43                | 0.45 |
| sec-butanol            | sBuOH   | 20.873            | -11.790           | 1.332             | 11.53                | 0.30 |
| n-pentanol             | nPeOH   | 34.206            | -20.257           | 2.695             | 14.61                | 0.34 |
| acetone                | AT      | 49.838            | -28.045           | 3.600             | 192.27               | 4.65 |
| acetonitrile           | AE      | 8.189             | -3.658            | 0.000             | 58.89                | 1.22 |
| dichloromethane        | DC      | 40.161            | -22.691           | 2.956             | 11.54                | 0.36 |
| ethyl acetate          | EA      | 44.601            | -26.411           | 3.577             | 178.67               | 4.16 |
| 1,4-dioxane            | D       | 17.497            | -9.079            | 0.865             | 21.92                | 0.68 |
| toluene                | T       | 3.251             | -1.145            | -0.296            | 7.08                 | 0.16 |
| 2,4-dimethylphenol     | DMP     | -16.508           | 14.856            | -3.315            | 3.76                 | 0.10 |
| 1-methyl-2-pyrrolidone | NMP     | 10.517            | -3.004            | -0.330            | 23.14                | 0.73 |
| diglyme                | DIG     | -12.269           | 9.697             | -2.146            | 7.41                 | 0.18 |
| triglyme               | TIG     | 62.116            | -33.404           | 4.066             | 5.93                 | 0.14 |
| tetraglyme             | TEG     | -31.442           | 27.130            | -5.565            | 32.42                | 1.16 |
| DMSO                   | DMSO    | -9.106            | 13.021            | -3.302            | 14.09                | 0.74 |
| 4FM                    | 4FM     | 9.308             | -4.112            | 0.000             | 15.91                | 0.31 |

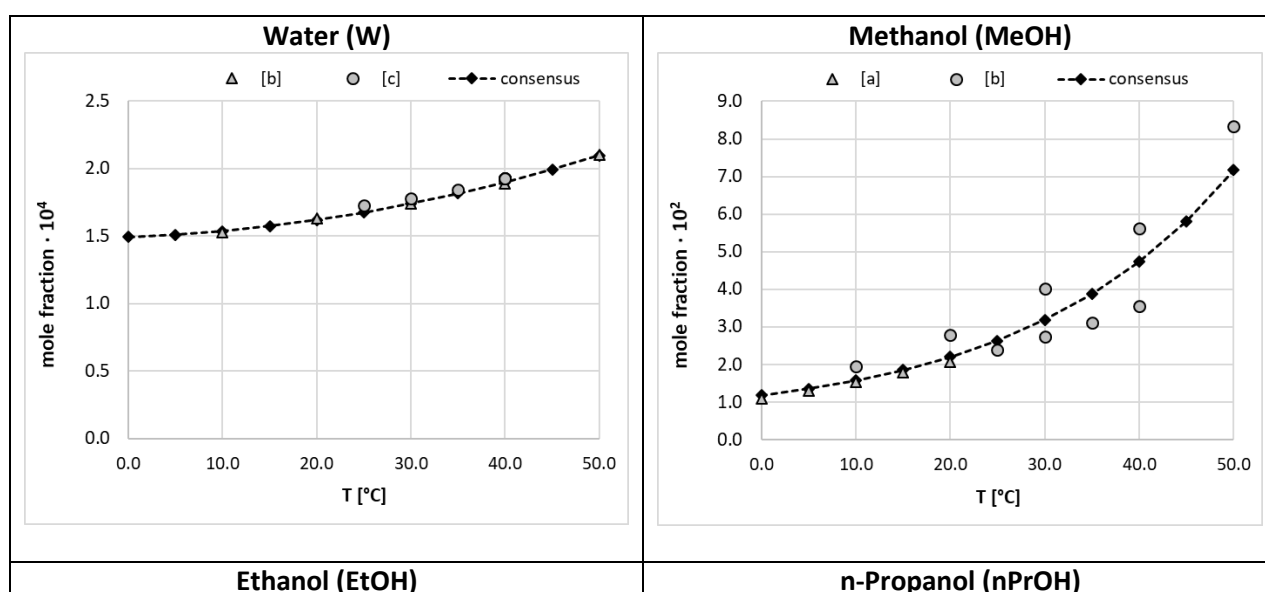

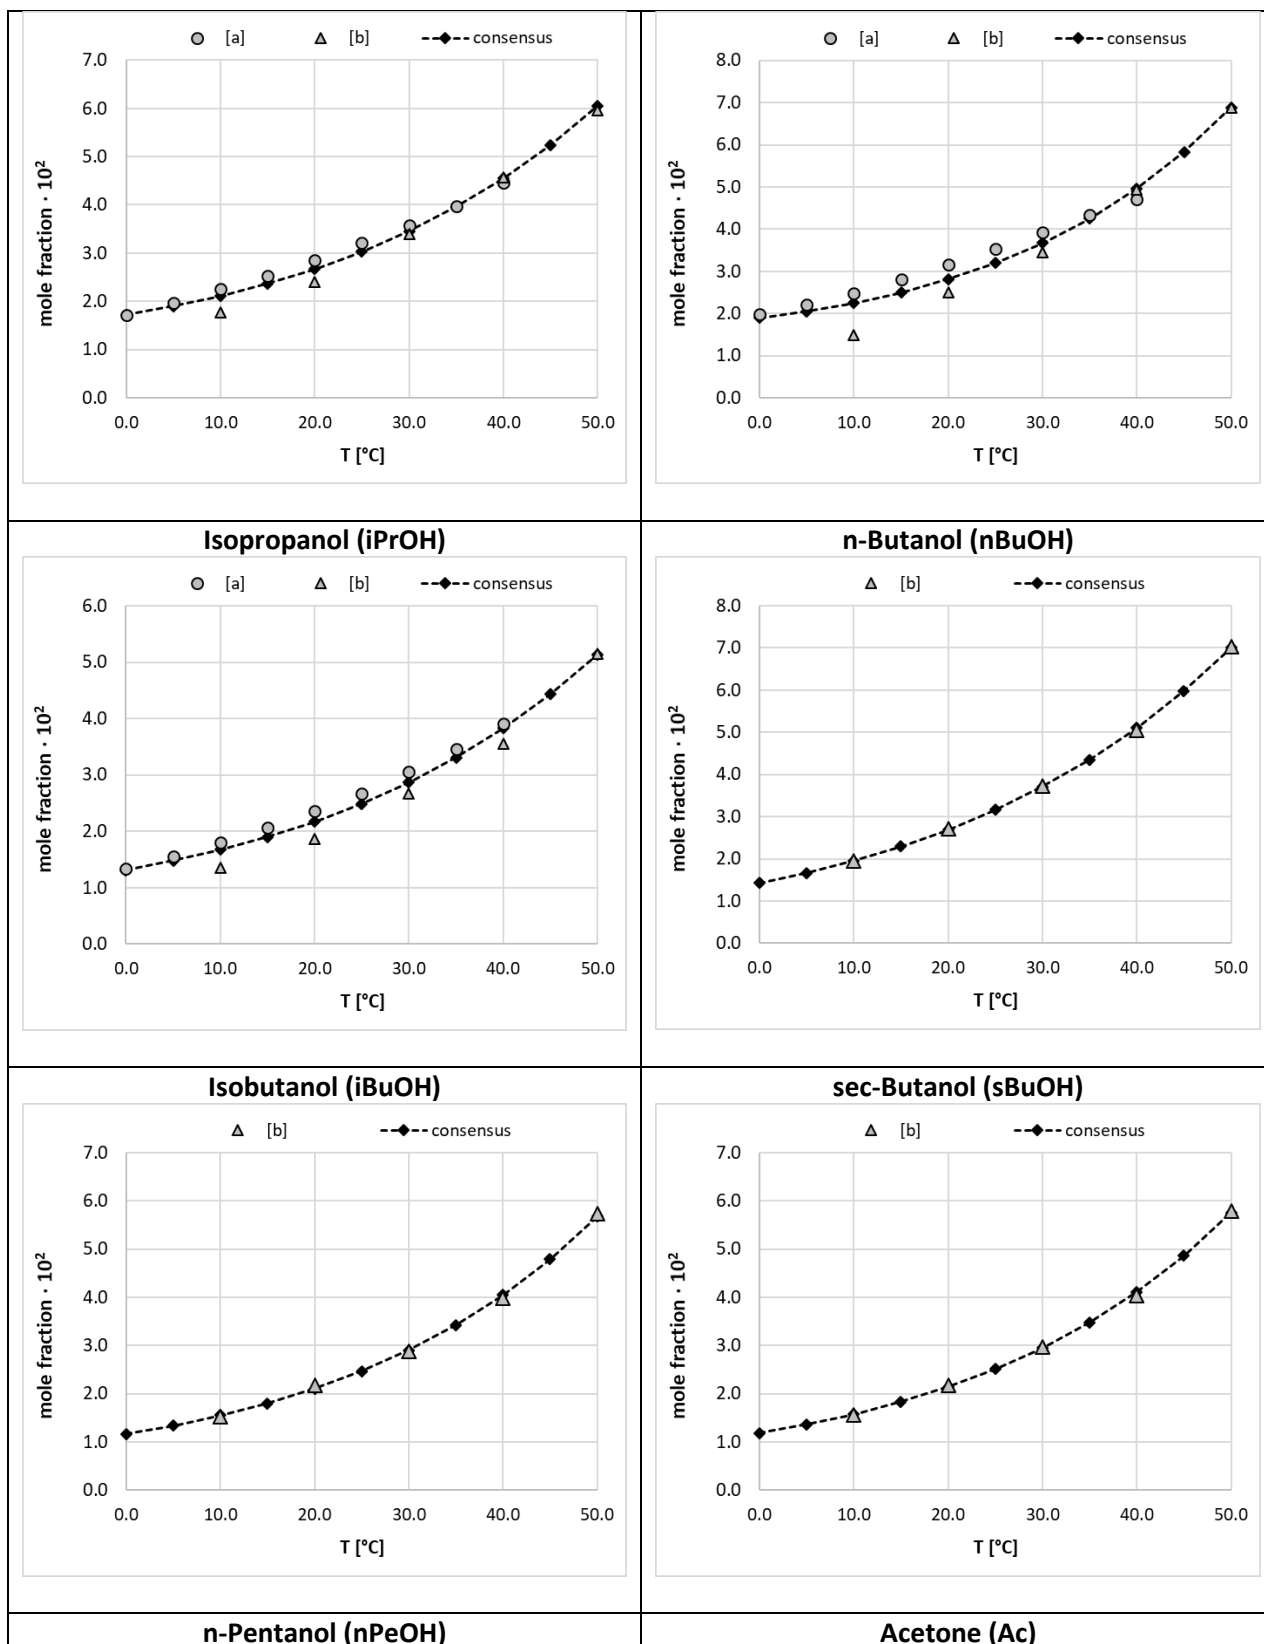

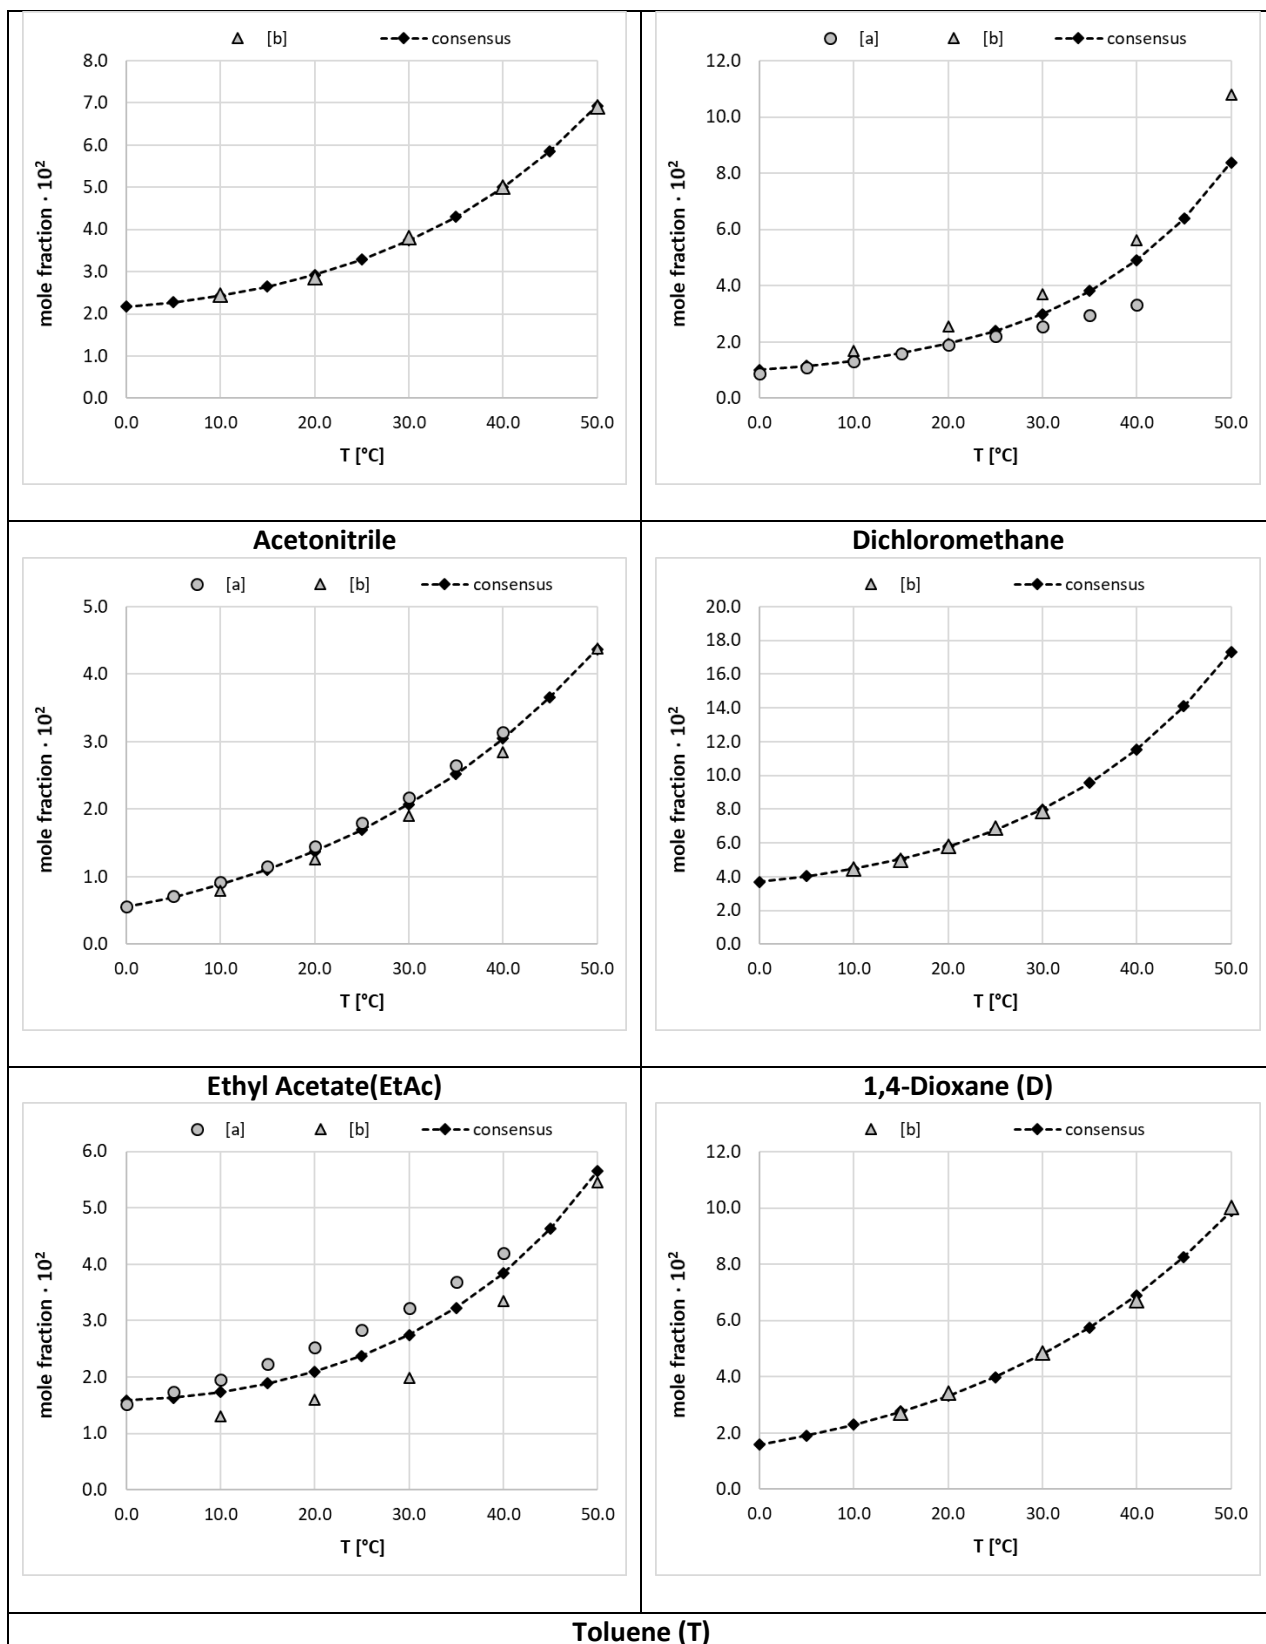

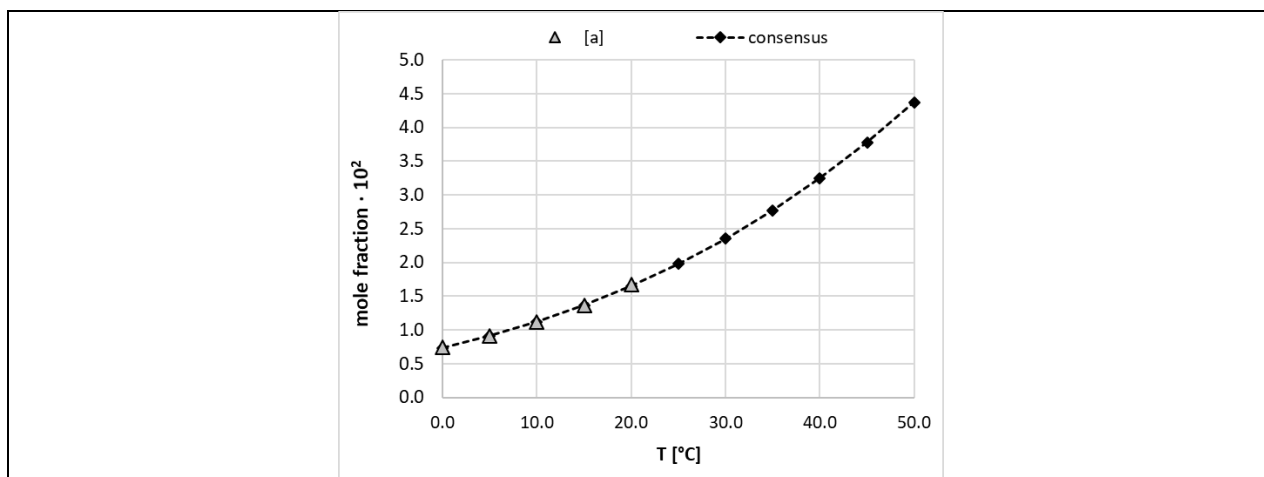

**Figure S2.1.** Graphical illustration of the solubility data curation of edaravone in neat solvents. The black diamonds represent curated values constituting the solubility dataset, while gray symbols characterize experimental points ([a], [b], [c] taken from references 18, 16, 17, respectively as cited in main text).

## S2.2. Binary solvents mixtures

$$\ln x_{w,T} = w_1 \ln x_{1,T} + w_2 \ln x_{2,T} + \frac{w_1 w_2}{T/K} \sum_{i=0}^2 J_i (w_1 - w_2)^i$$

**Table S2.2.** Solubility data curation of edaravone in binary solvents. All experimental data come from reference 18 as cited in main text or from this work.

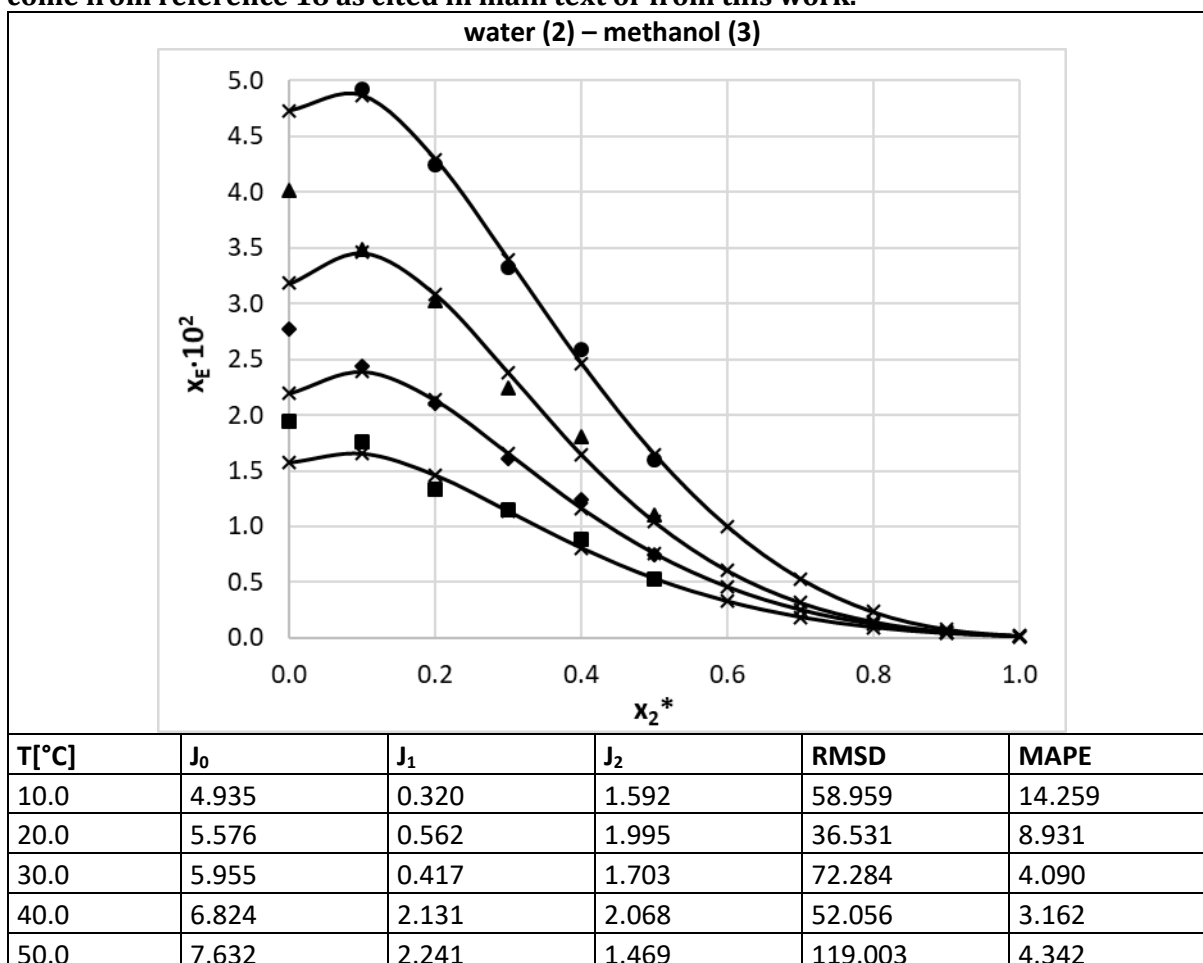

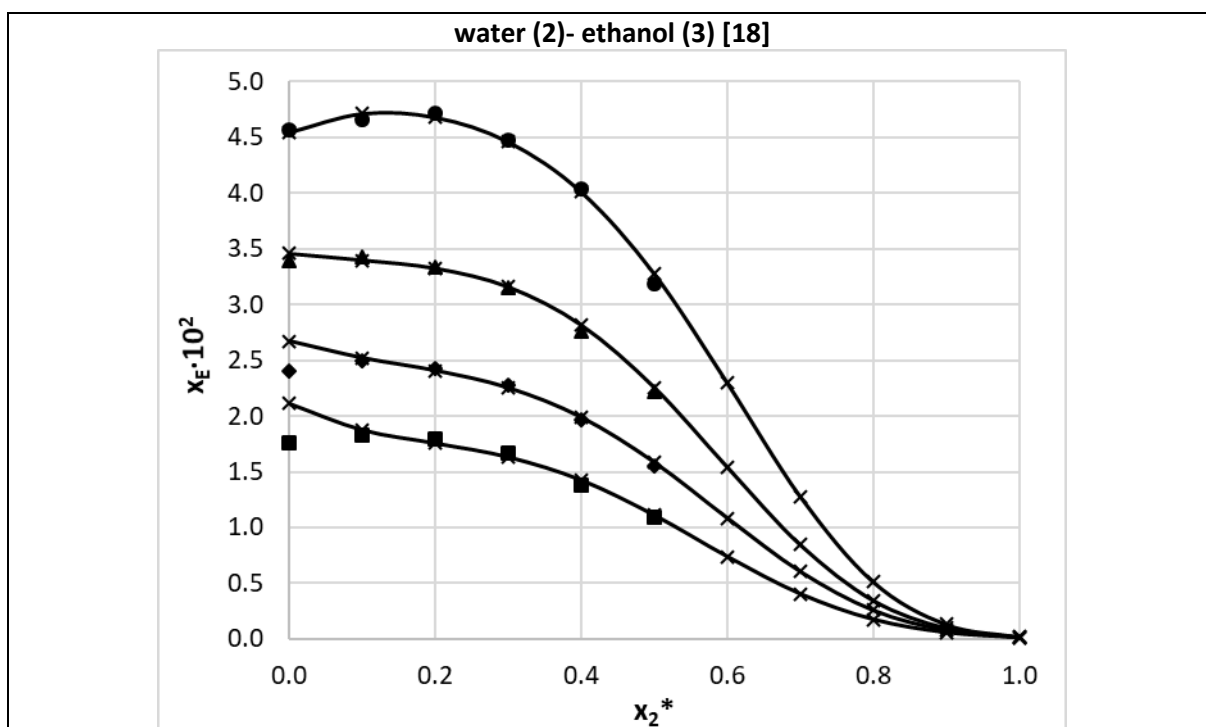

| T[°C] | $J_0$  | $J_1$ | $J_2$  | RMSD   | MAPE  |
|-------|--------|-------|--------|--------|-------|
| 10.0  | 7.281  | 3.449 | -0.574 | 32.544 | 6.264 |
| 20.0  | 8.122  | 4.338 | 0.587  | 30.913 | 5.251 |
| 30.0  | 8.877  | 4.757 | 0.964  | 49.154 | 5.418 |
| 40.0  | 9.646  | 5.615 | 2.082  | 58.181 | 5.770 |
| 50.0  | 10.520 | 6.562 | 3.602  | 87.403 | 6.526 |

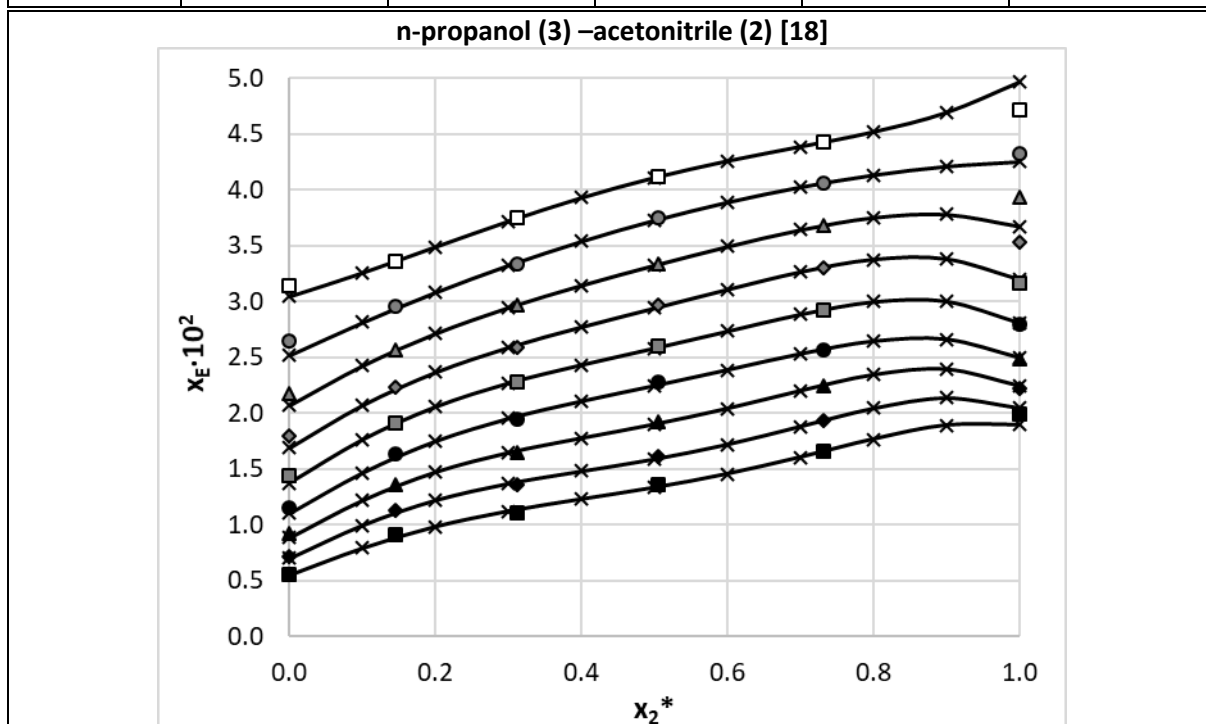

| T[°C] | $J_0$ | $J_1$  | $J_2$ | RMSD   | MAPE  |
|-------|-------|--------|-------|--------|-------|
| 0.0   | 1.069 | -0.816 | 1.467 | 15.902 | 1.065 |
| 5.0   | 1.131 | -0.666 | 1.658 | 12.582 | 0.691 |

|      |       |        |        |        |       |
|------|-------|--------|--------|--------|-------|
| 10.0 | 1.198 | -0.494 | 1.470  | 13.761 | 0.629 |
| 15.0 | 1.204 | -0.398 | 1.128  | 19.602 | 0.756 |
| 20.0 | 1.092 | -0.275 | 1.030  | 6.988  | 0.228 |
| 25.0 | 0.936 | -0.138 | 0.778  | 13.604 | 0.392 |
| 30.0 | 0.746 | -0.106 | 0.453  | 3.783  | 0.096 |
| 35.0 | 0.521 | -0.109 | 0.060  | 13.166 | 0.294 |
| 40.0 | 0.223 | -0.180 | -0.249 | 1.361  | 0.027 |

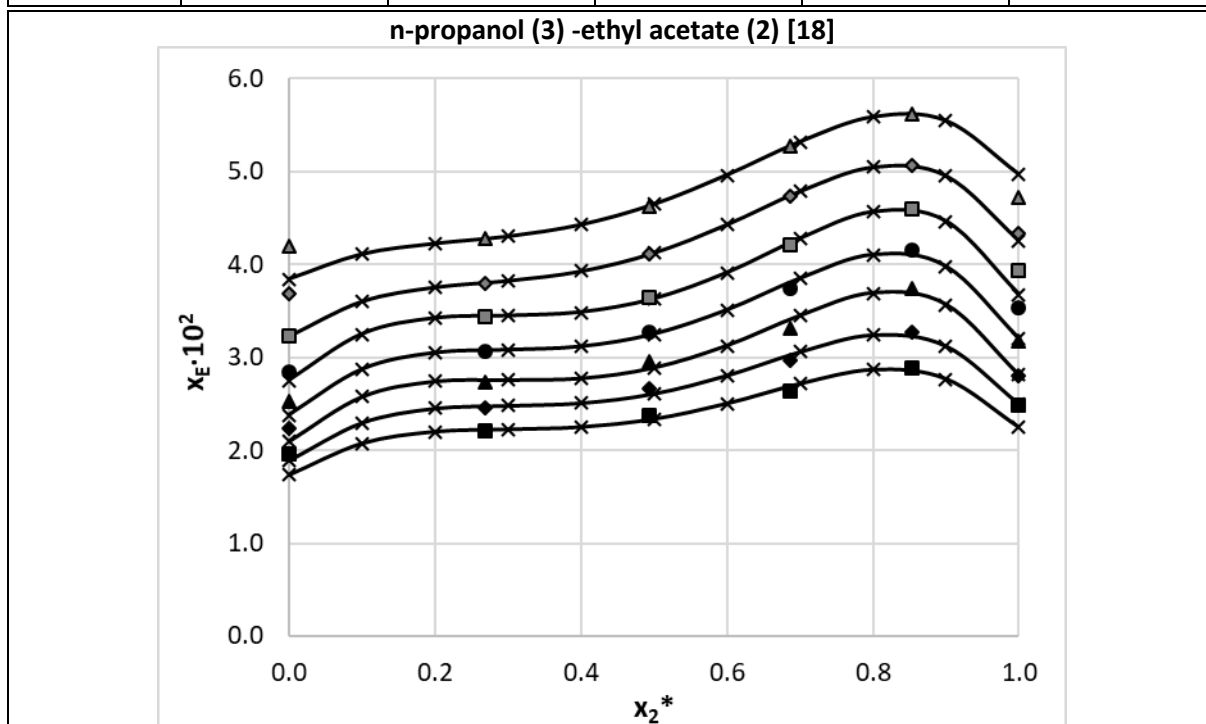

| T[°C] | J <sub>0</sub> | J <sub>1</sub> | J <sub>2</sub> | RMSD   | MAPE  |
|-------|----------------|----------------|----------------|--------|-------|
| 0.0   | 0.348          | 0.736          | 0.694          | 2.541  | 0.094 |
| 5.0   | 0.523          | 0.591          | 1.736          | 17.786 | 0.608 |
| 10.0  | 0.674          | 0.563          | 2.305          | 32.779 | 0.989 |
| 15.0  | 0.737          | 0.579          | 2.493          | 41.052 | 1.104 |
| 20.0  | 0.693          | 0.629          | 2.765          | 54.727 | 1.314 |
| 25.0  | 0.655          | 0.618          | 2.495          | 34.850 | 0.716 |
| 30.0  | 0.531          | 0.592          | 2.309          | 15.065 | 0.290 |
| 35.0  | 0.427          | 0.671          | 1.604          | 5.045  | 0.087 |
| 40.0  | 0.246          | 0.652          | 1.153          | 2.607  | 0.040 |

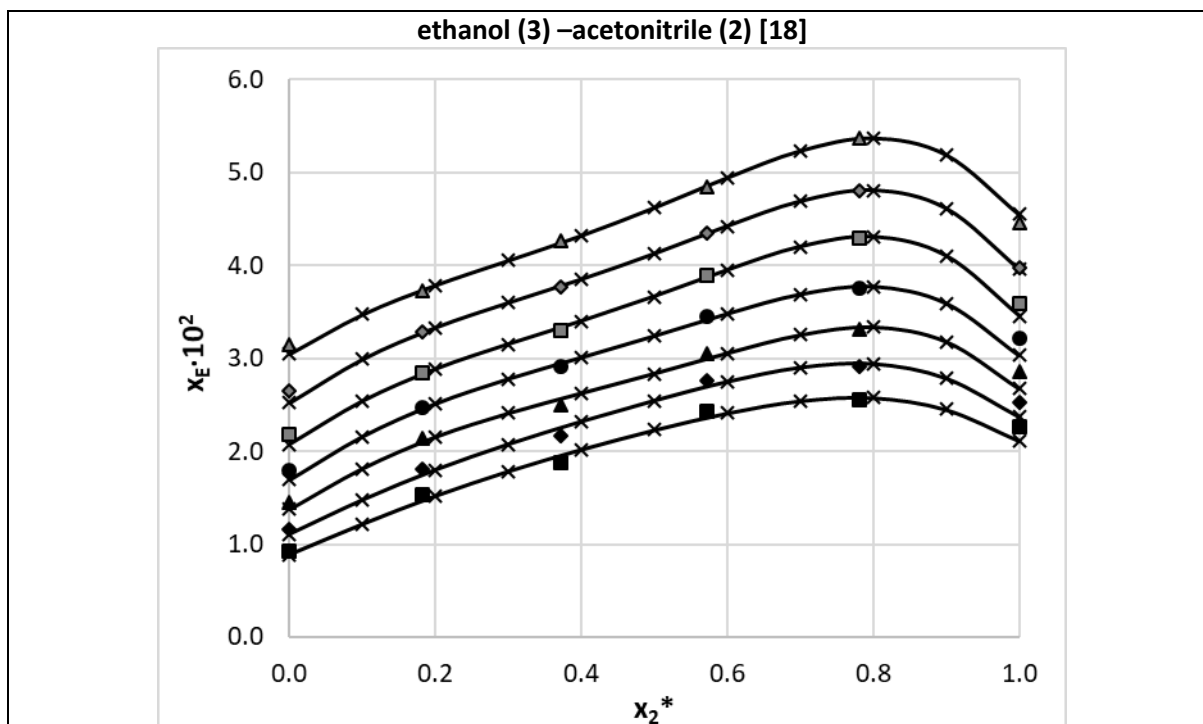

| T[°C] | $J_0$ | $J_1$  | $J_2$ | RMSD   | MAPE  |
|-------|-------|--------|-------|--------|-------|
| 0.0   | 2.244 | -0.142 | 0.369 | 16.928 | 0.823 |
| 5.0   | 2.130 | -0.042 | 0.741 | 27.080 | 1.264 |
| 10.0  | 1.959 | 0.039  | 0.986 | 49.030 | 1.951 |
| 15.0  | 1.810 | 0.182  | 1.075 | 50.854 | 1.740 |
| 20.0  | 1.570 | 0.198  | 1.470 | 39.716 | 1.175 |
| 25.0  | 1.433 | 0.297  | 1.346 | 25.193 | 0.621 |
| 30.0  | 1.255 | 0.491  | 1.274 | 18.085 | 0.407 |
| 35.0  | 1.066 | 0.501  | 1.135 | 4.698  | 0.093 |
| 40.0  | 0.865 | 0.566  | 0.927 | 10.274 | 0.180 |

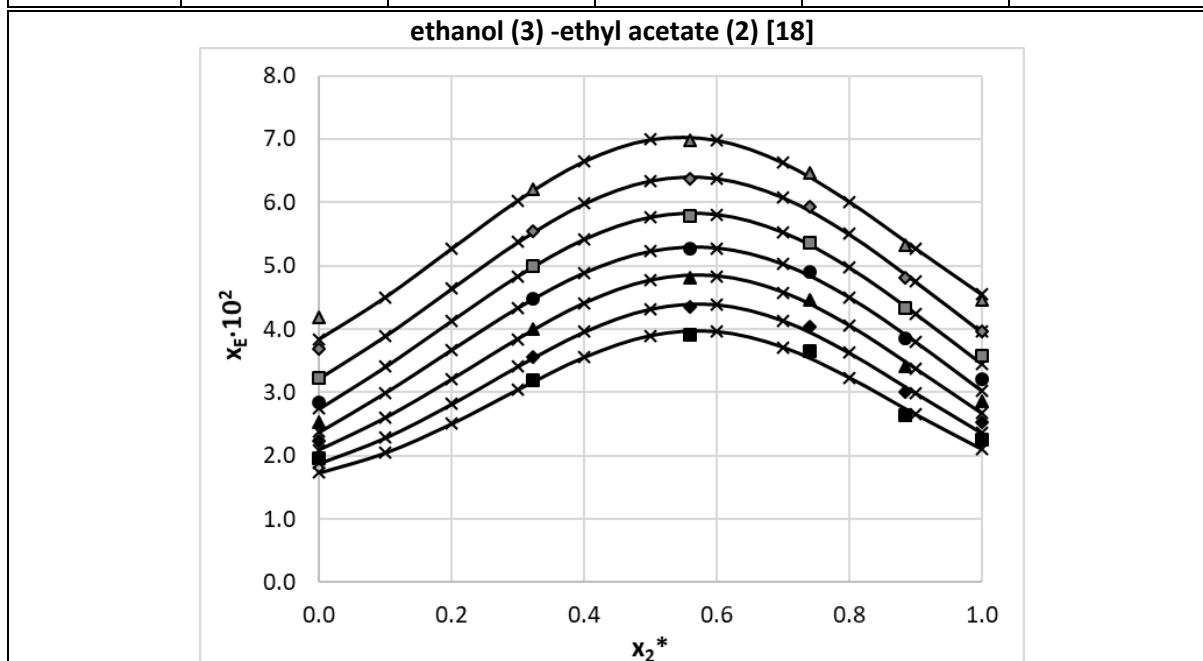

| T[°C] | $J_0$ | $J_1$ | $J_2$  | RMSD    | MAPE  |
|-------|-------|-------|--------|---------|-------|
| 0.0   | 2.559 | 0.951 | -1.637 | 102.143 | 2.974 |

|      |       |       |        |        |       |
|------|-------|-------|--------|--------|-------|
| 5.0  | 2.792 | 0.817 | -1.586 | 91.718 | 2.223 |
| 10.0 | 2.843 | 0.714 | -0.996 | 68.643 | 1.564 |
| 15.0 | 2.860 | 0.601 | -0.737 | 55.115 | 1.117 |
| 20.0 | 2.805 | 0.463 | -0.471 | 47.899 | 0.867 |
| 25.0 | 2.665 | 0.301 | -0.192 | 35.629 | 0.579 |
| 30.0 | 2.503 | 0.246 | -0.261 | 27.505 | 0.393 |
| 35.0 | 2.296 | 0.247 | -0.361 | 37.908 | 0.502 |
| 40.0 | 2.058 | 0.159 | -0.546 | 47.431 | 0.570 |

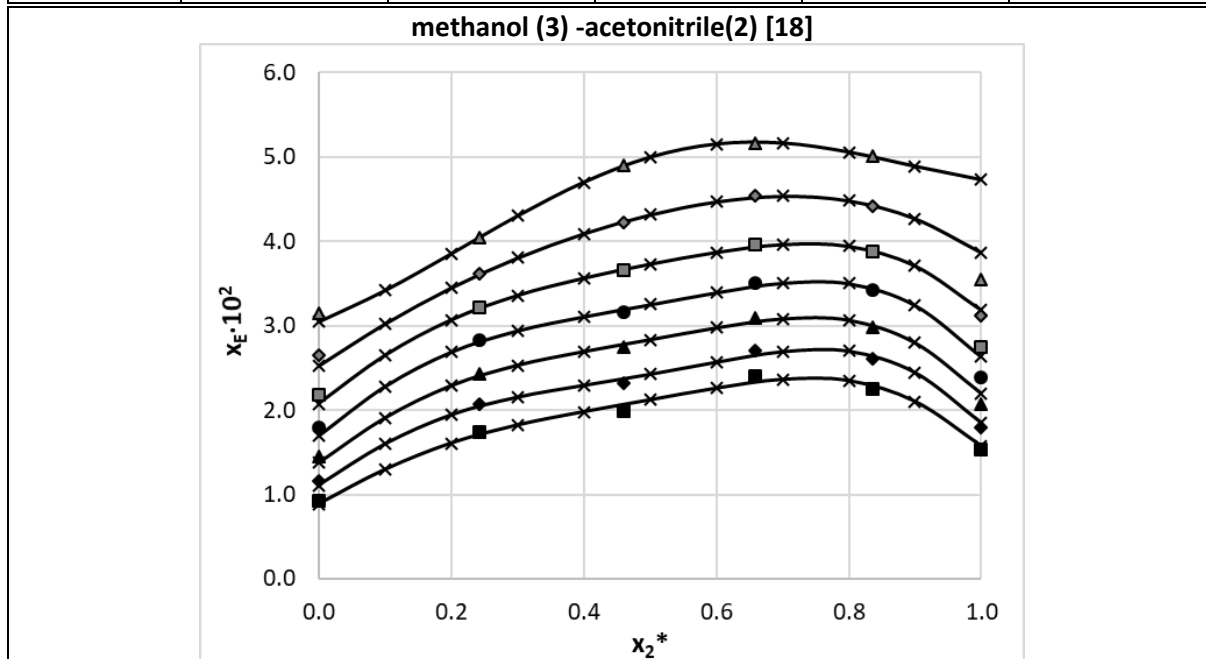

| T[°C] | $J_0$ | $J_1$  | $J_2$  | RMSD   | MAPE  |
|-------|-------|--------|--------|--------|-------|
| 0.0   | 2.752 | -0.076 | 1.068  | 24.958 | 1.287 |
| 5.0   | 2.534 | 0.047  | 1.954  | 40.614 | 1.634 |
| 10.0  | 2.350 | 0.179  | 2.151  | 49.757 | 1.839 |
| 15.0  | 2.113 | 0.109  | 2.314  | 36.525 | 1.162 |
| 20.0  | 1.960 | 0.051  | 1.891  | 26.510 | 0.726 |
| 25.0  | 1.726 | -0.005 | 1.693  | 21.156 | 0.504 |
| 30.0  | 1.493 | -0.034 | 1.118  | 12.033 | 0.242 |
| 35.0  | 1.293 | 0.030  | 0.405  | 9.733  | 0.178 |
| 40.0  | 1.098 | 0.043  | -0.434 | 6.343  | 0.102 |

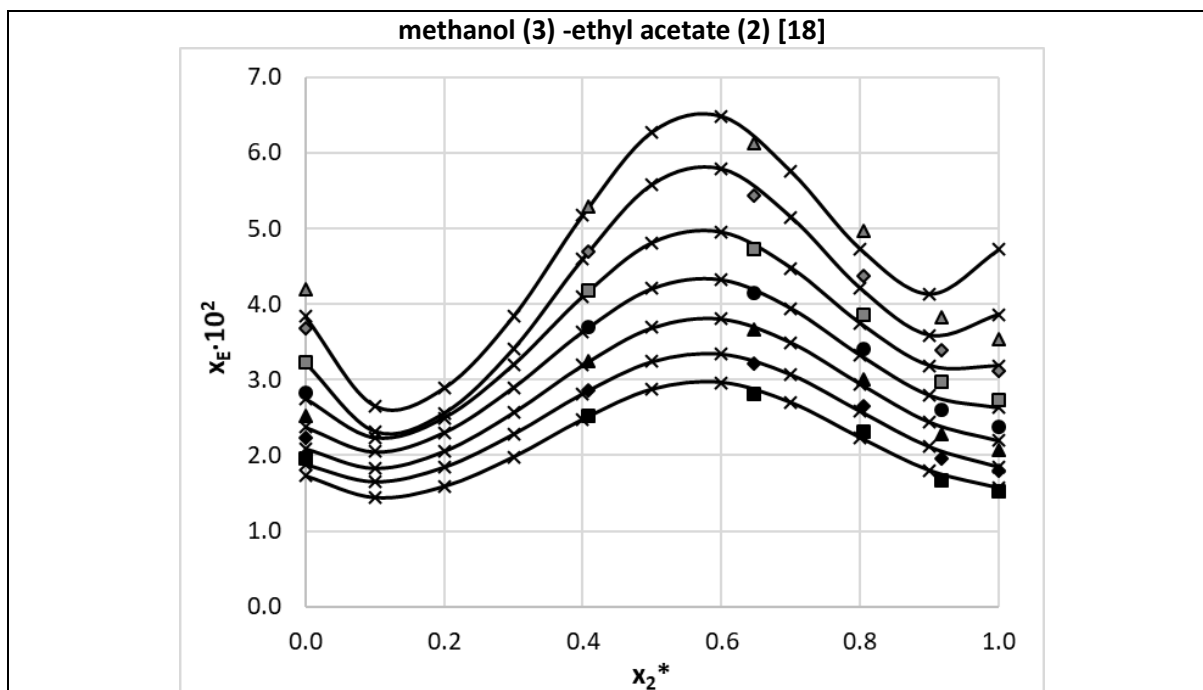

| T[°C] | J <sub>0</sub> | J <sub>1</sub> | J <sub>2</sub> | RMSD    | MAPE  |
|-------|----------------|----------------|----------------|---------|-------|
| 0.0   | 1.765          | 1.825          | -2.584         | 61.288  | 2.725 |
| 5.0   | 2.022          | 1.807          | -2.824         | 52.796  | 2.027 |
| 10.0  | 2.220          | 2.071          | -3.857         | 55.394  | 1.836 |
| 15.0  | 2.209          | 1.805          | -3.397         | 55.023  | 1.589 |
| 20.0  | 2.172          | 1.724          | -3.630         | 57.723  | 1.448 |
| 25.0  | 2.079          | 1.590          | -4.015         | 71.032  | 1.563 |
| 30.0  | 1.948          | 1.661          | -4.848         | 92.465  | 1.790 |
| 35.0  | 1.832          | 2.029          | -6.378         | 117.226 | 2.005 |
| 40.0  | 1.551          | 1.919          | -6.782         | 176.555 | 2.651 |

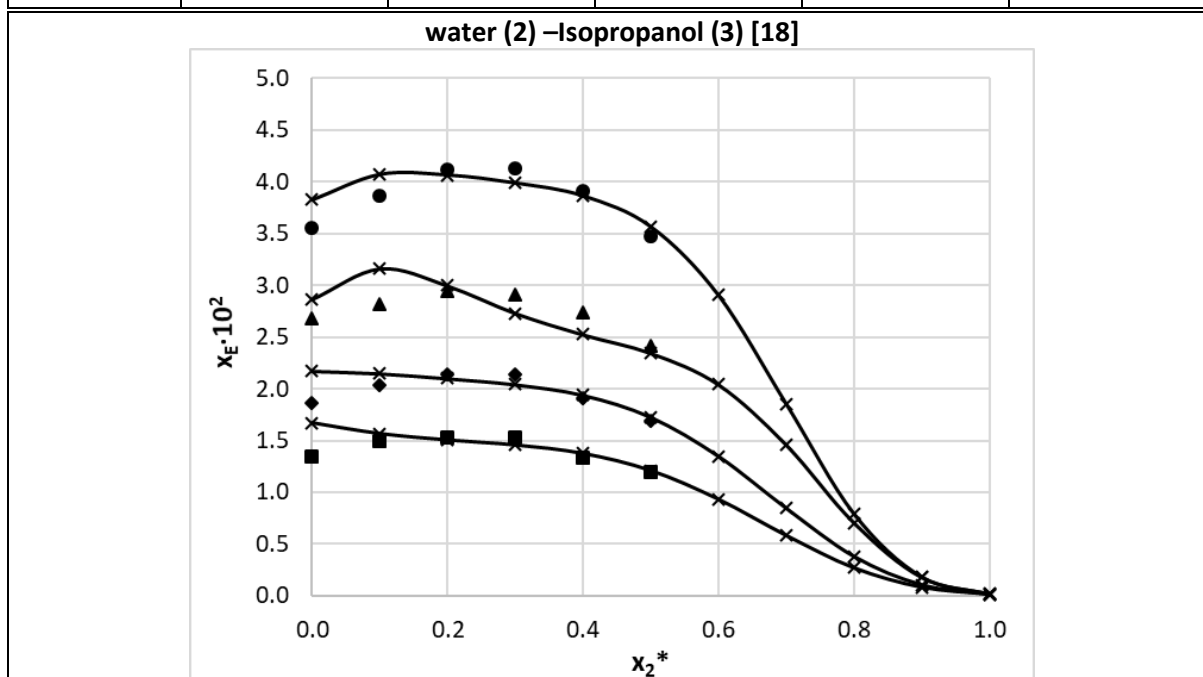

| T[°C] | J <sub>0</sub> | J <sub>1</sub> | J <sub>2</sub> | RMSD   | MAPE  |
|-------|----------------|----------------|----------------|--------|-------|
| 10.0  | 8.087          | 5.722          | 1.542          | 42.478 | 4.391 |

|      |        |       |       |         |       |
|------|--------|-------|-------|---------|-------|
| 20.0 | 8.881  | 6.437 | 2.481 | 63.409  | 6.063 |
| 30.0 | 9.406  | 8.426 | 6.408 | 149.800 | 5.715 |
| 40.0 | 10.331 | 8.081 | 4.253 | 137.453 | 8.299 |
| 50.0 | 11.214 | 8.878 | 5.335 | 218.016 | 9.134 |

diethylene glycol (2) -water(3) [this work]

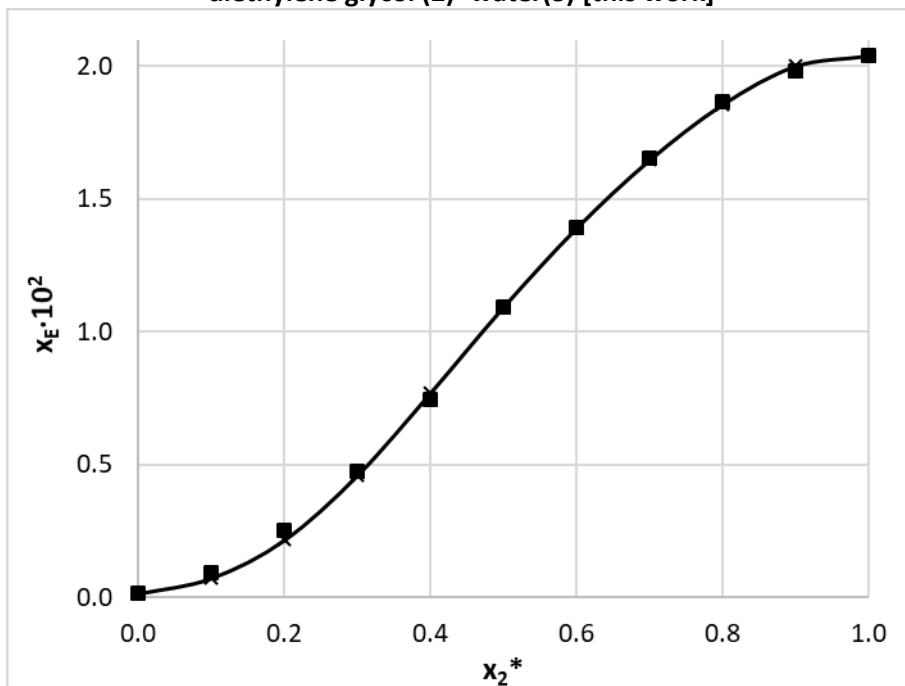

| T[°C] | $J_0$ | $J_1$  | $J_2$ | RMSD   | MAPE  |
|-------|-------|--------|-------|--------|-------|
| 25.0  | 7.112 | -3.865 | 1.720 | 16.725 | 3.815 |

triethylene glycol (2) -water (3) [this work]

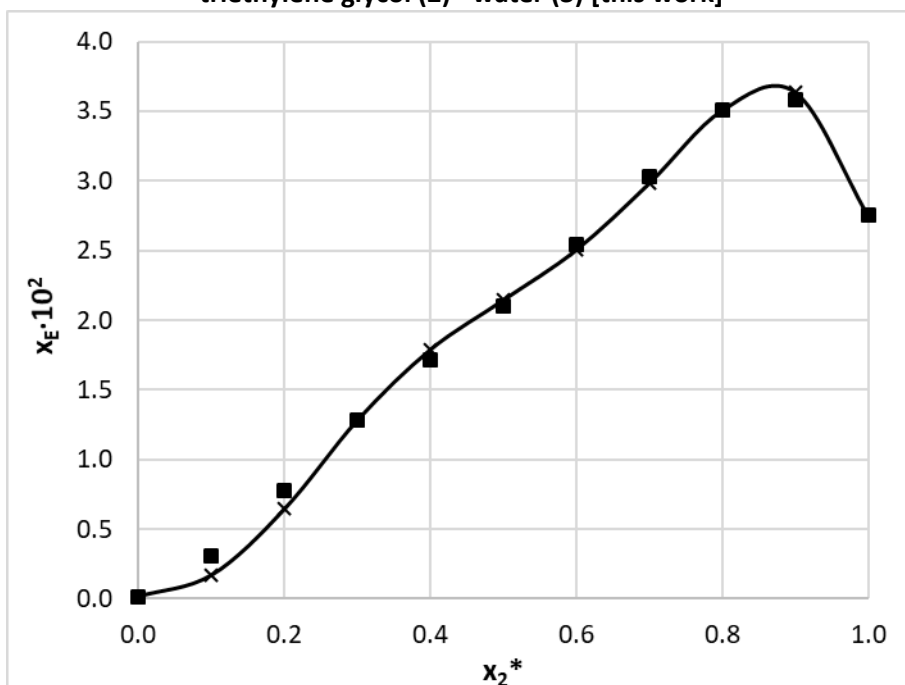

| T[°C] | $J_0$ | $J_1$  | $J_2$ | RMSD   | MAPE  |
|-------|-------|--------|-------|--------|-------|
| 25.0  | 9.207 | -7.124 | 8.221 | 67.058 | 6.571 |

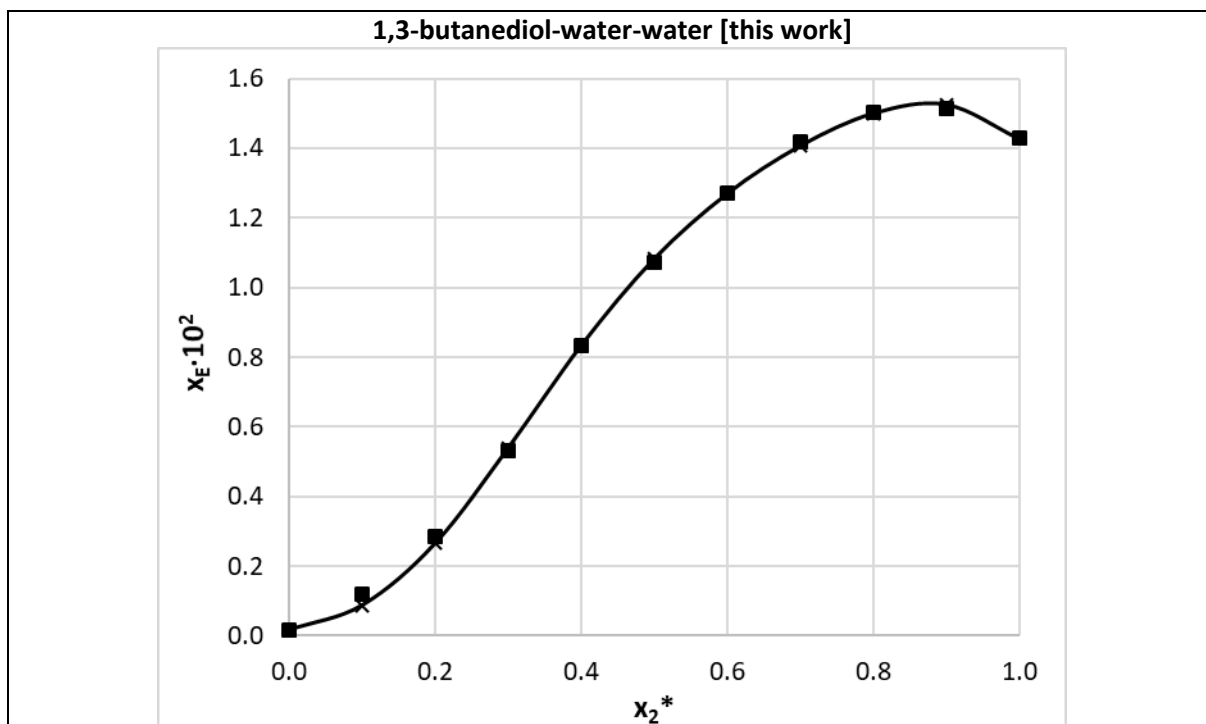

| T[°C] | $J_0$ | $J_1$  | $J_2$ | RMSD   | MAPE  |
|-------|-------|--------|-------|--------|-------|
| 25.0  | 7.787 | -4.889 | 2.818 | 13.222 | 3.480 |

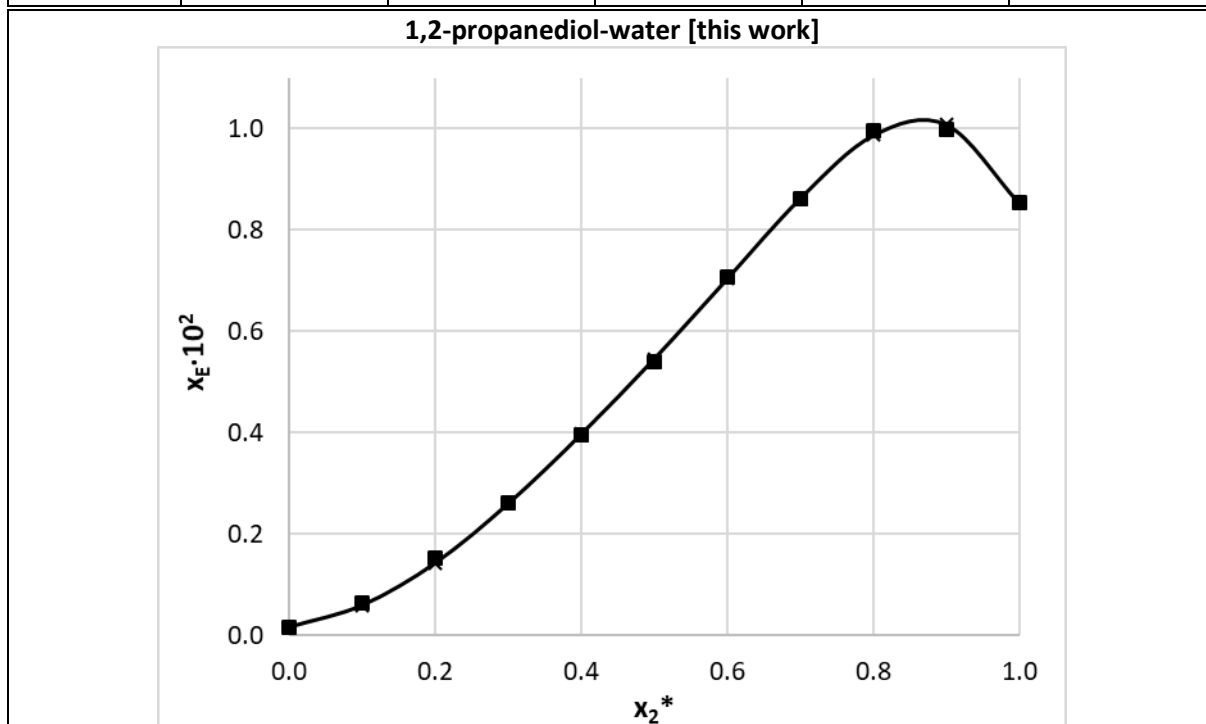

| T[°C] | $J_0$ | $J_1$  | $J_2$ | RMSD  | MAPE  |
|-------|-------|--------|-------|-------|-------|
| 25.0  | 6.077 | -2.239 | 3.021 | 5.422 | 1.480 |

### S3. Regressor models characteristics

**Table S3.1.** Graphical illustration of the of the regression model performance belonging to set A. The panels a,b, and c document the correlation between computed and consensus solubility values with annotation of the standard deviation as circles radius, applicability domain plots, and results of learning curve analysis concerning both  $R^2$  and MAE, respectively.

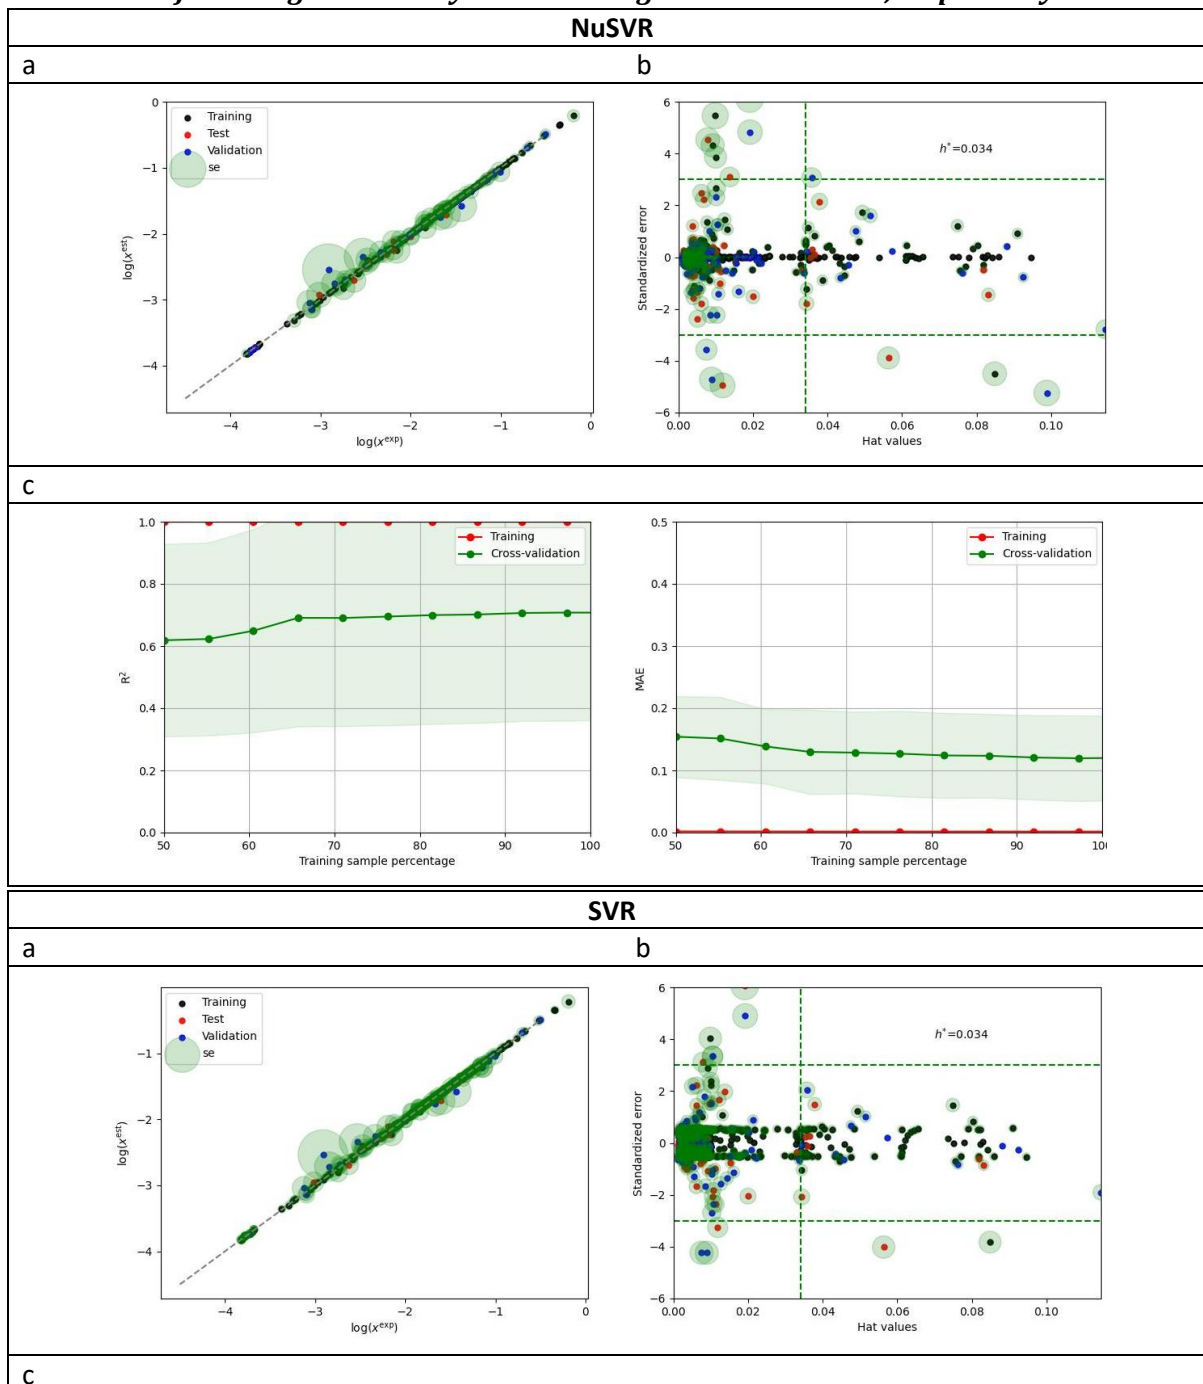

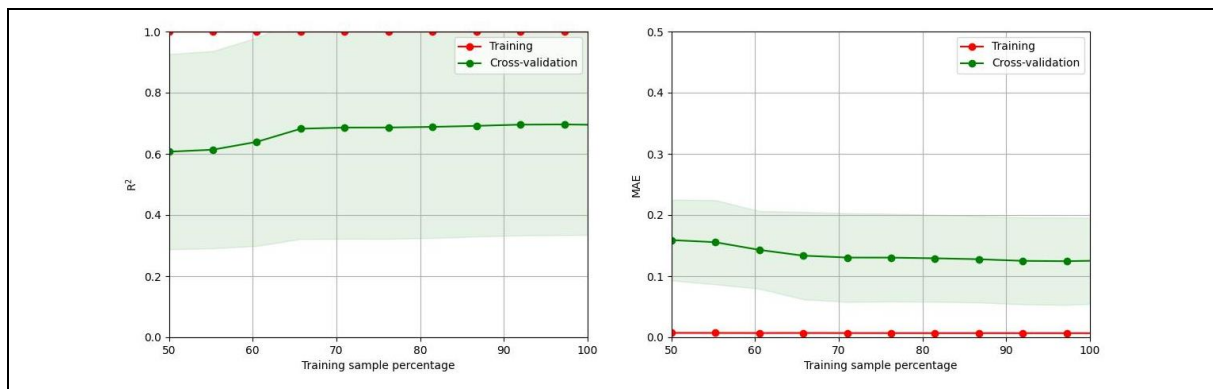

### CatBoostRegressor

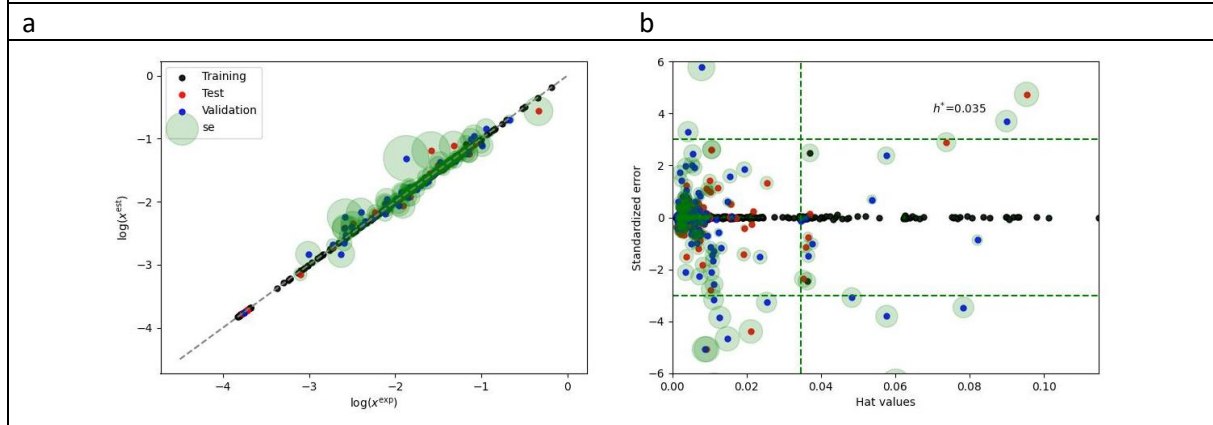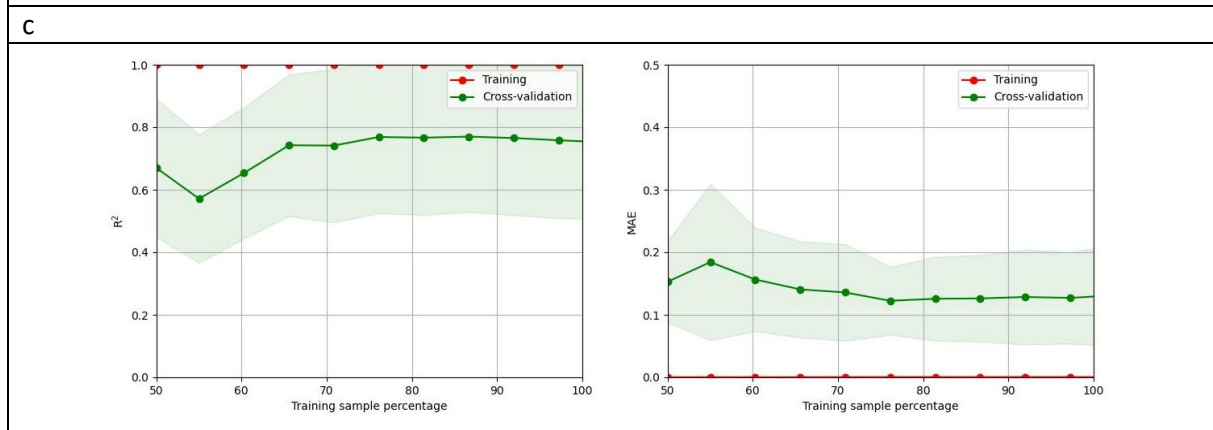

### XGBRegressor

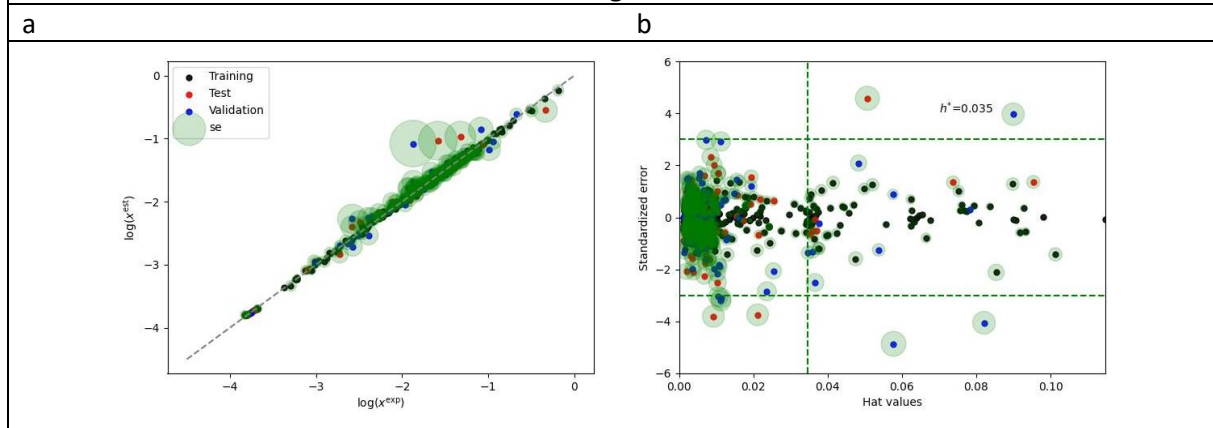

C

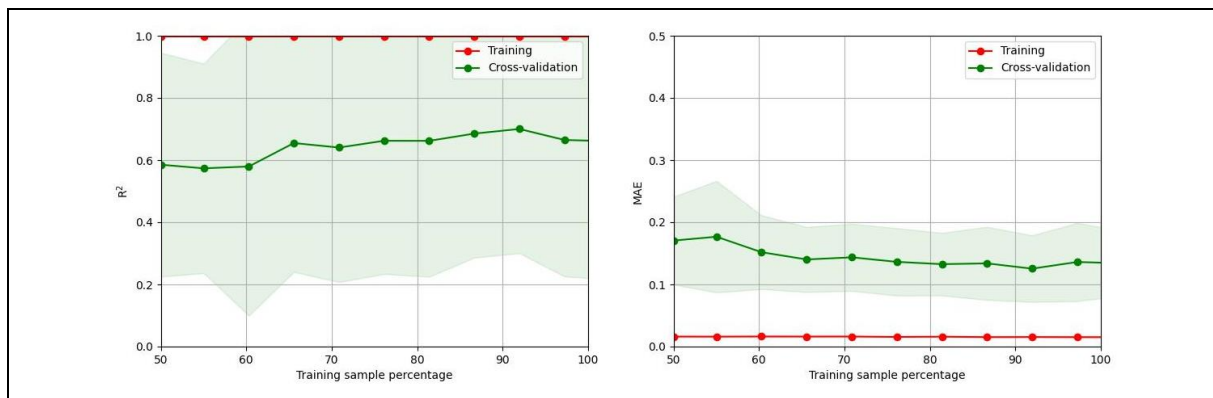

### HistGradientBoostingRegressor

a

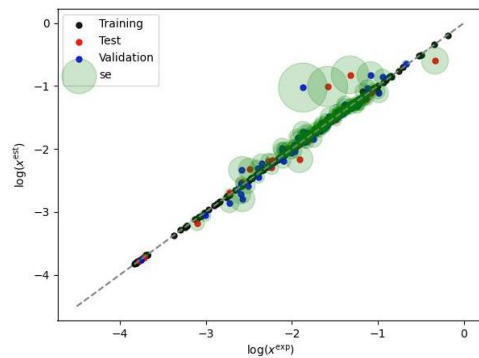

b

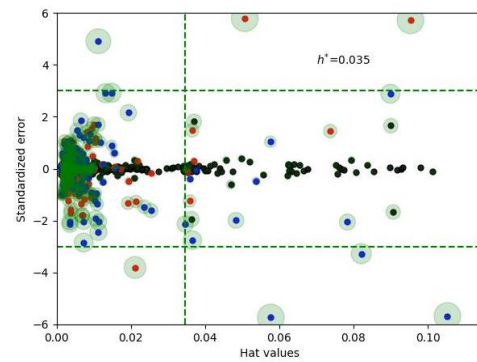

c

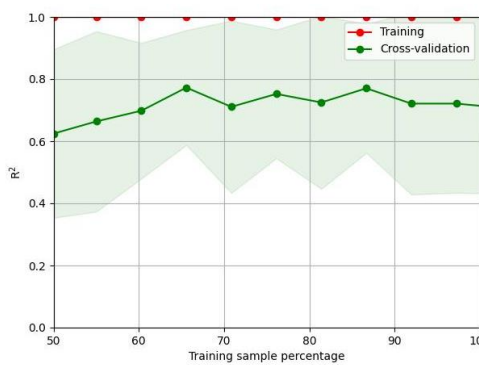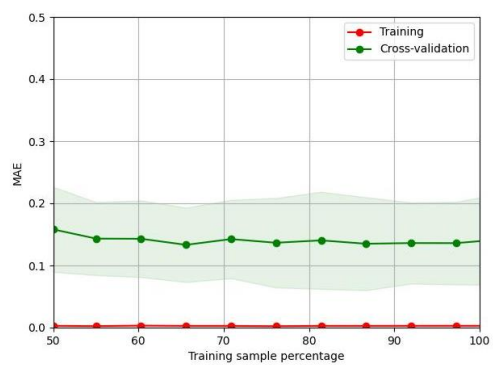

**Table S3.2. Graphical illustration of the of the regression model performance belonging to set B. The panels a,b, and c document the correlation between computed and consensus solubility values with annotation of the standard deviation as circles radius, applicability domain plots, and results of learning curve analysis concerning both R<sup>2</sup> and MAE, respectively.**

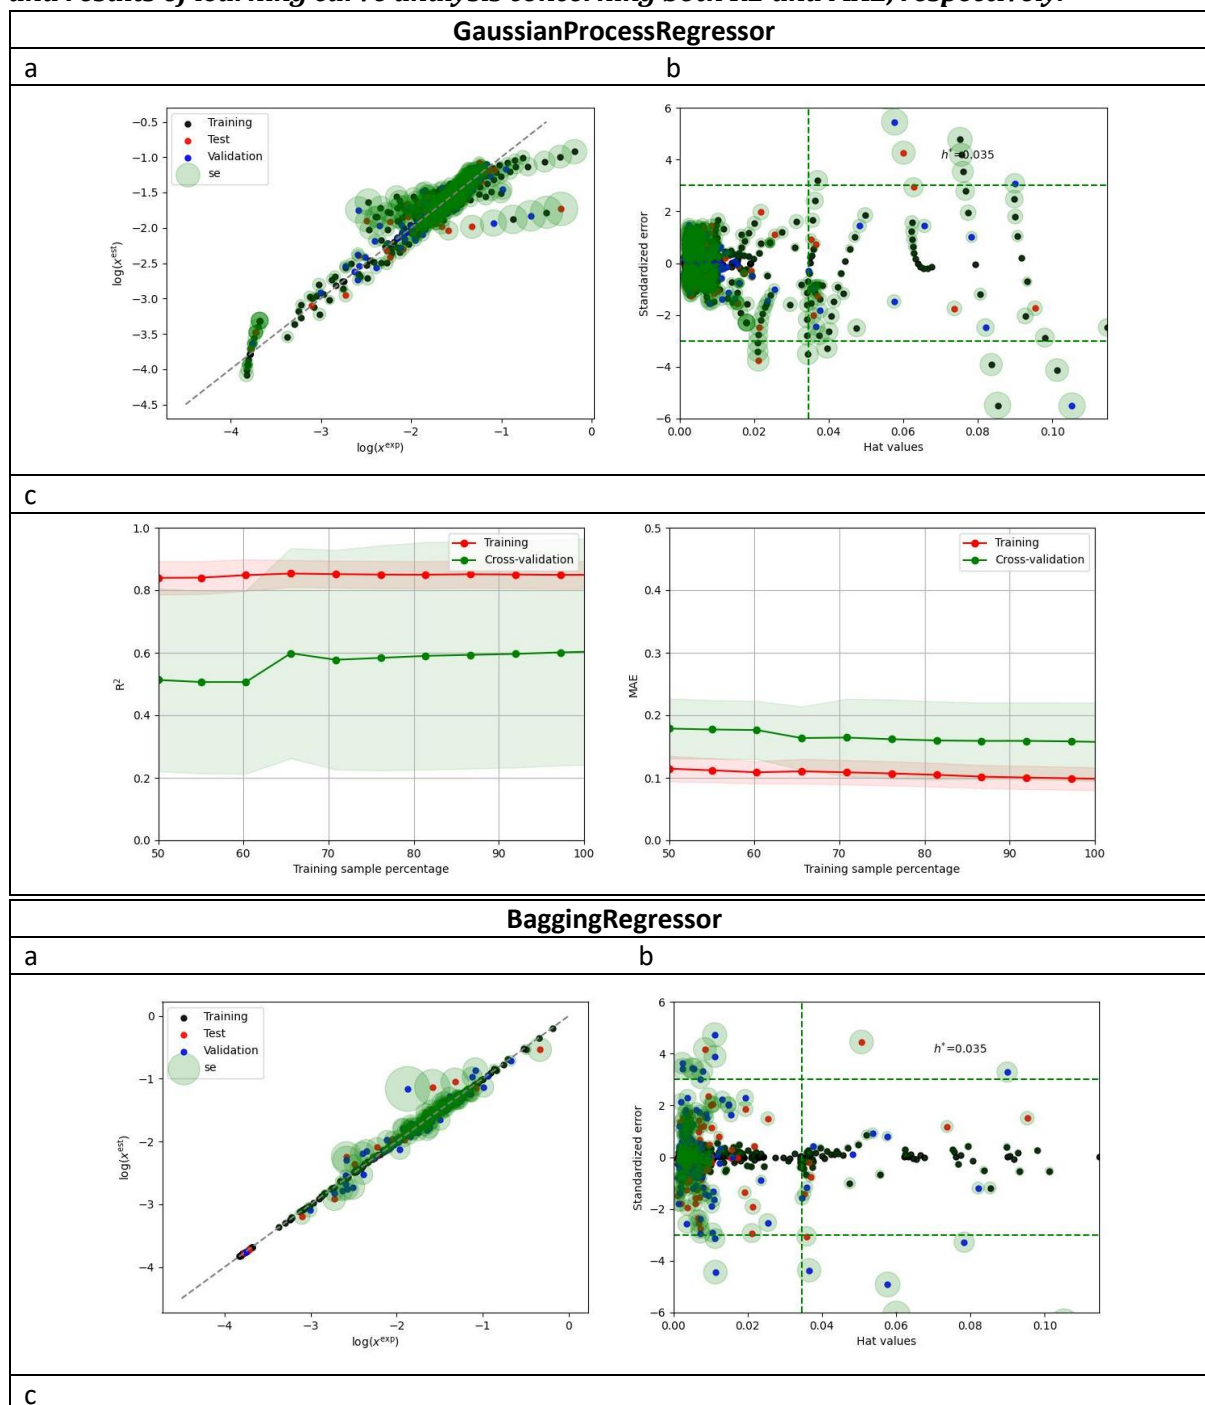

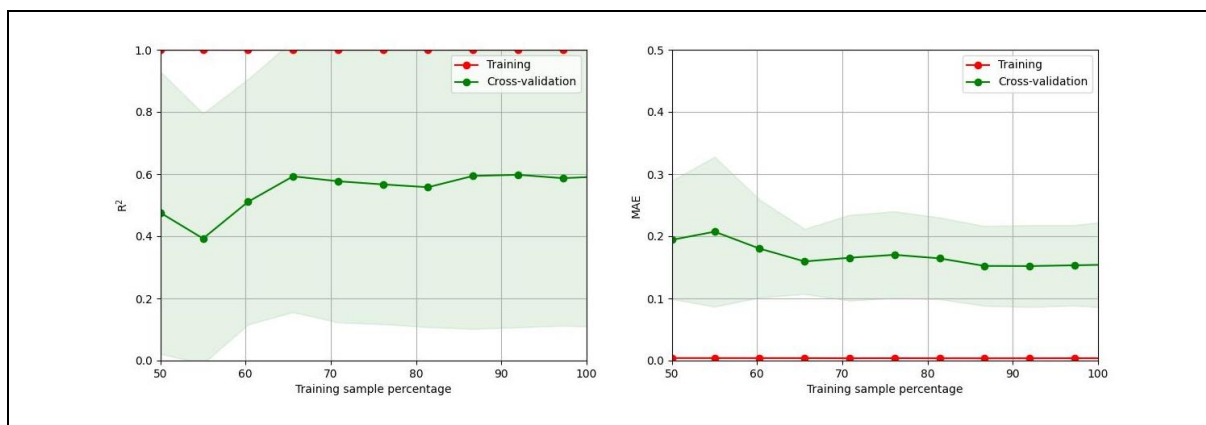

### RandomForestRegressor

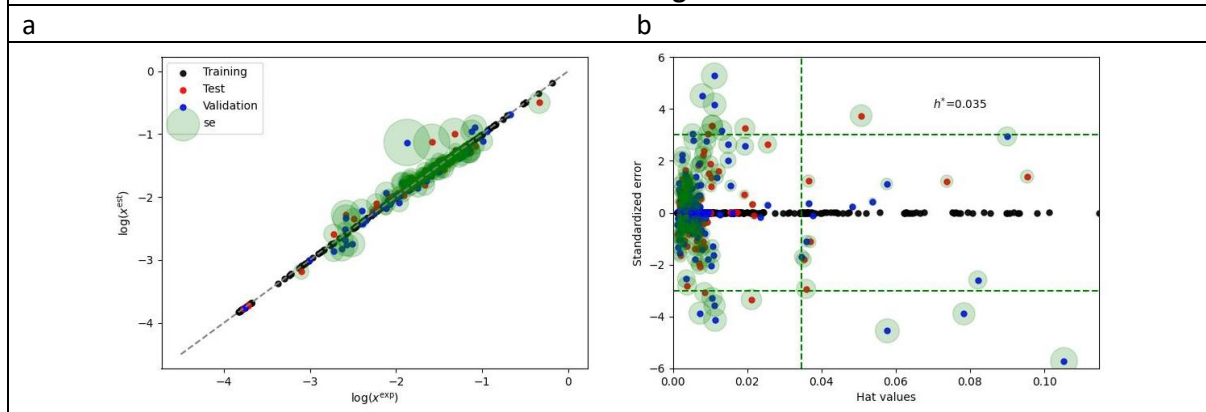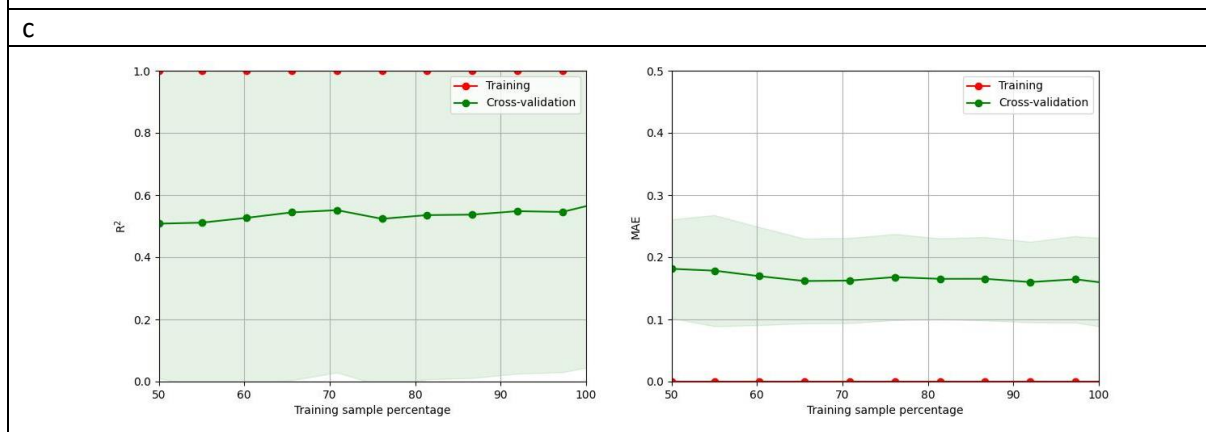

### LGBMRegressor

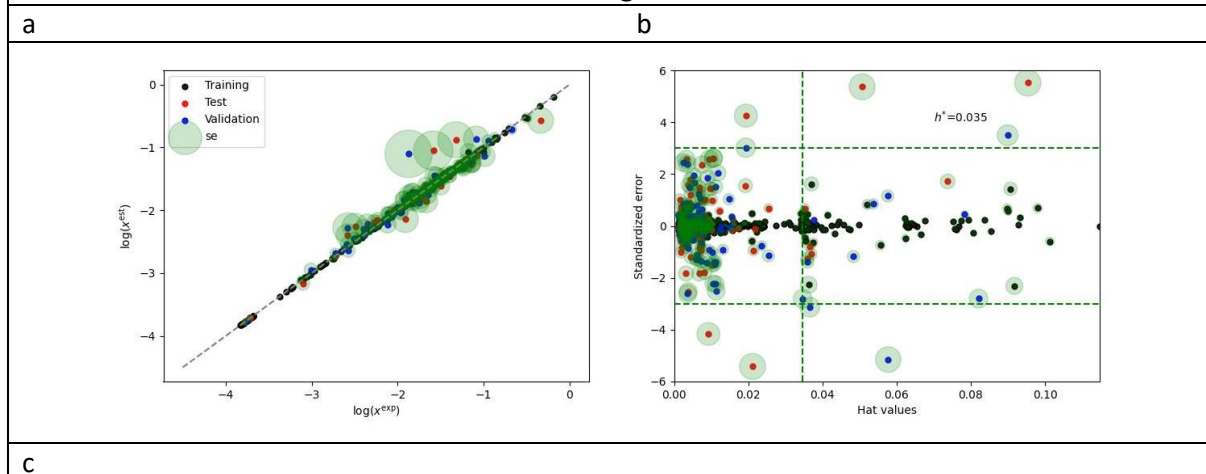

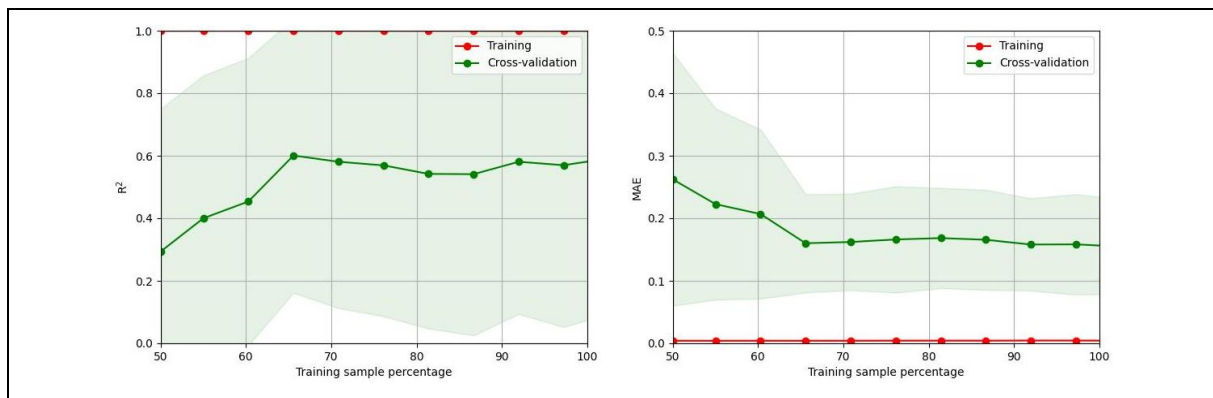

### MLPregressor

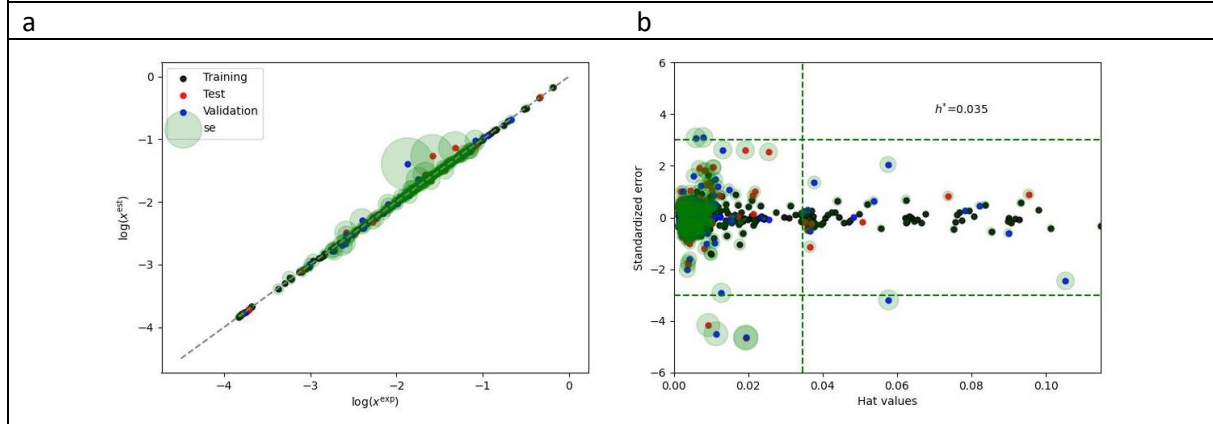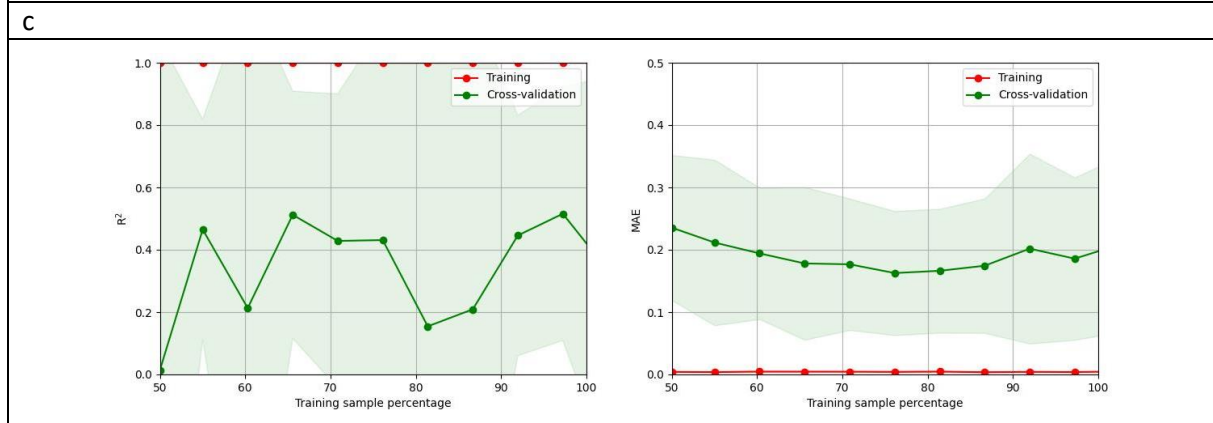

### Lassolars

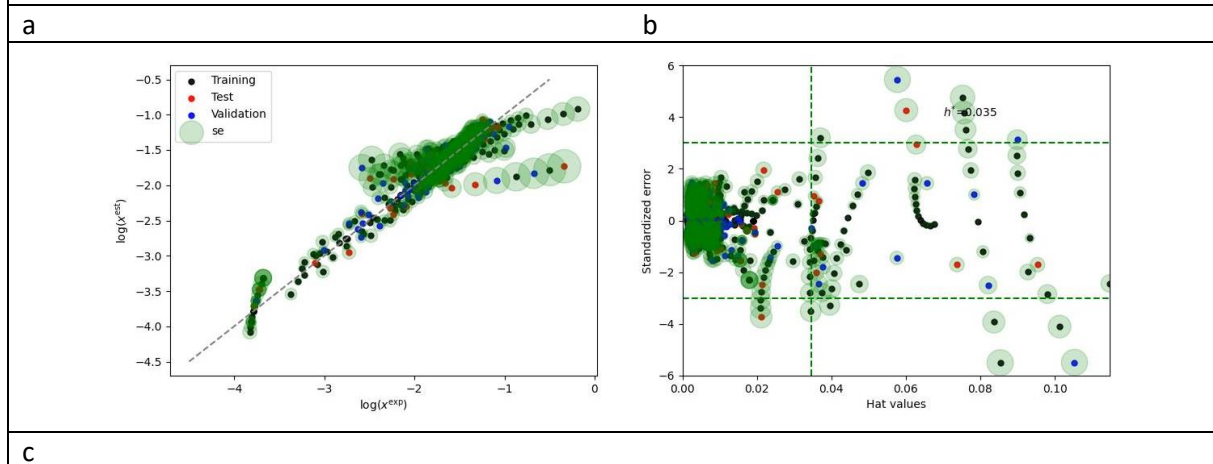

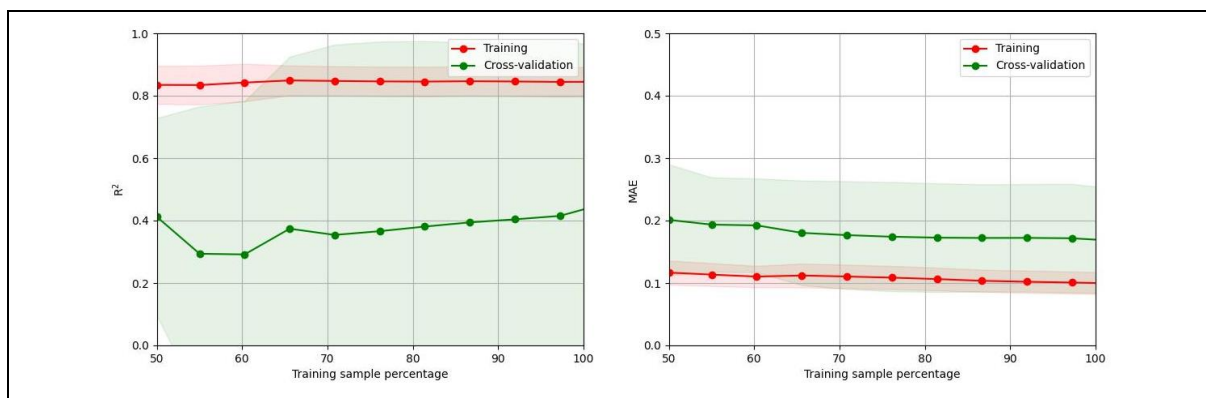

### LassoLarsCV

a

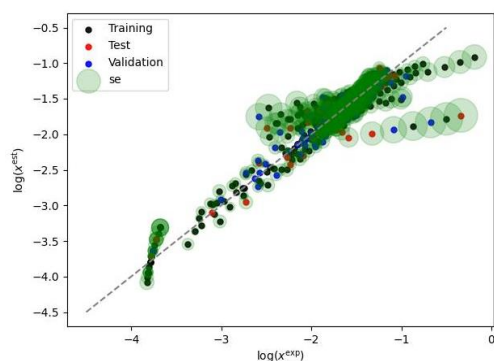

b

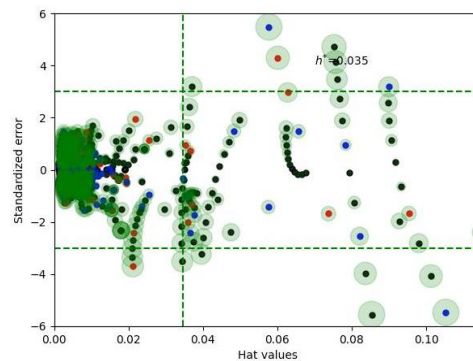

c

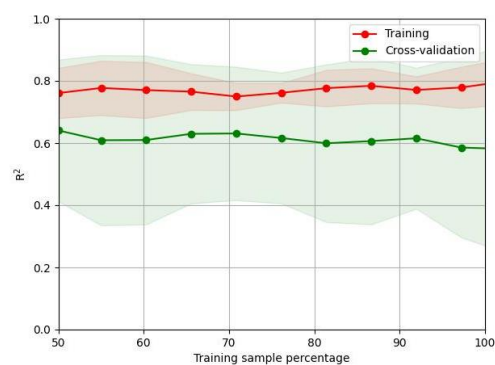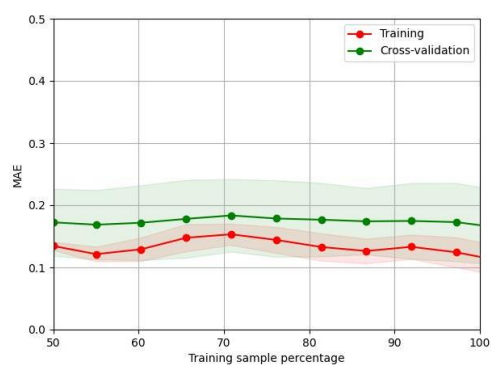

### Ridge

a

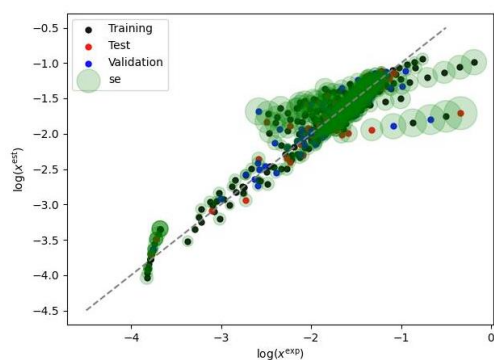

b

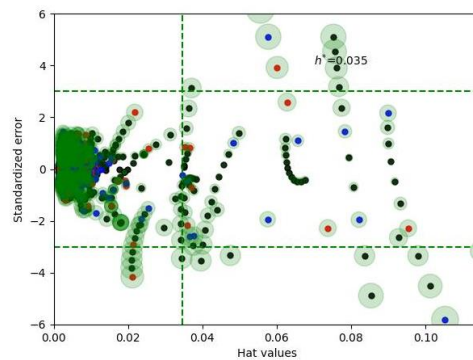

c

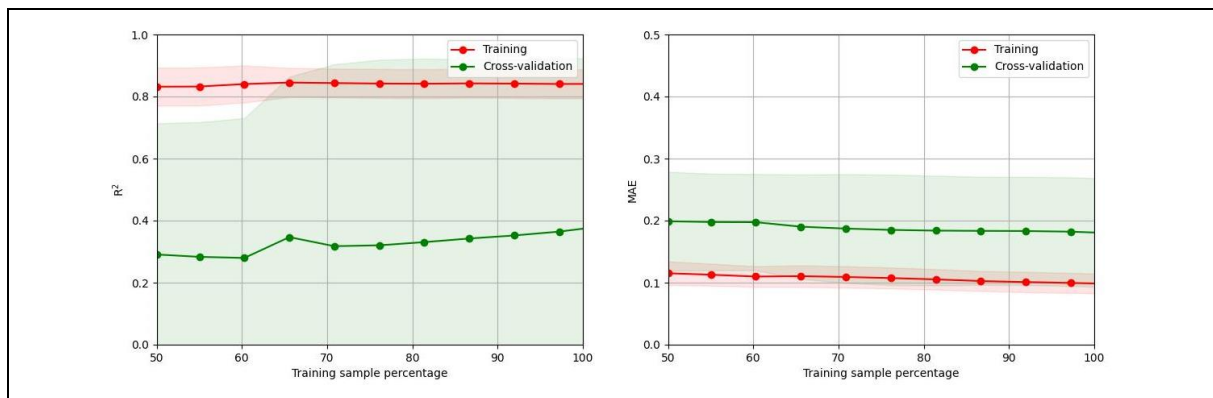

### KNeighborsRegressor

a

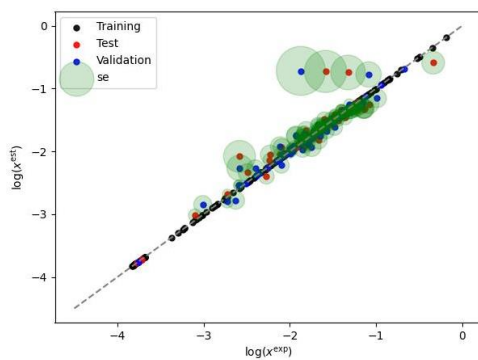

b

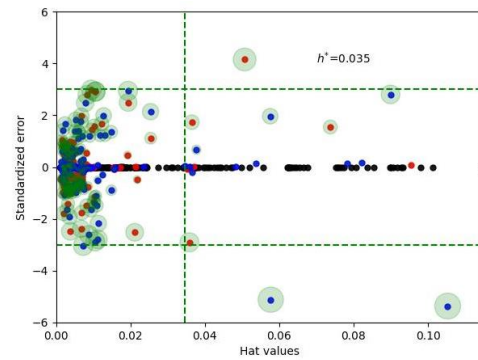

c

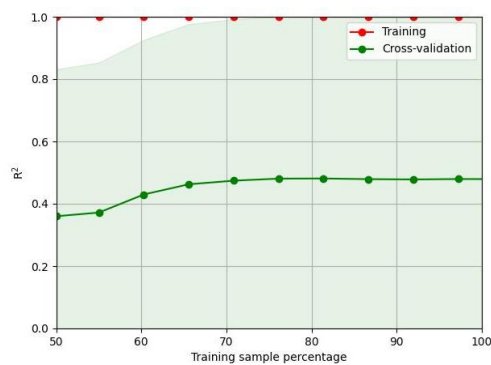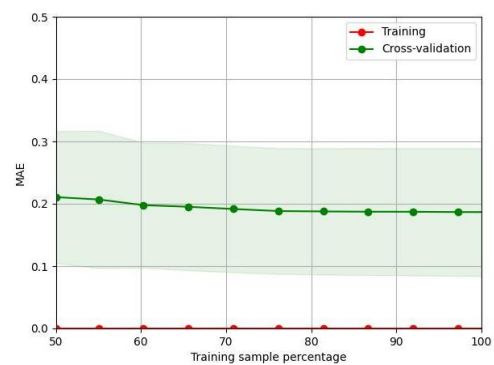

### AdaBoostRegressor

a

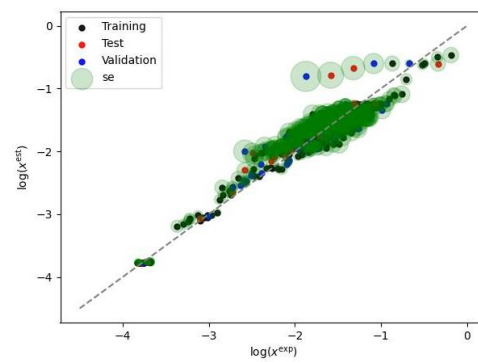

b

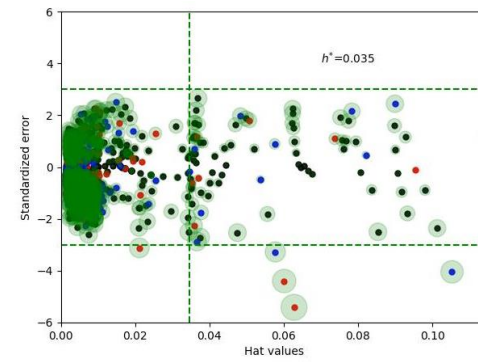

c

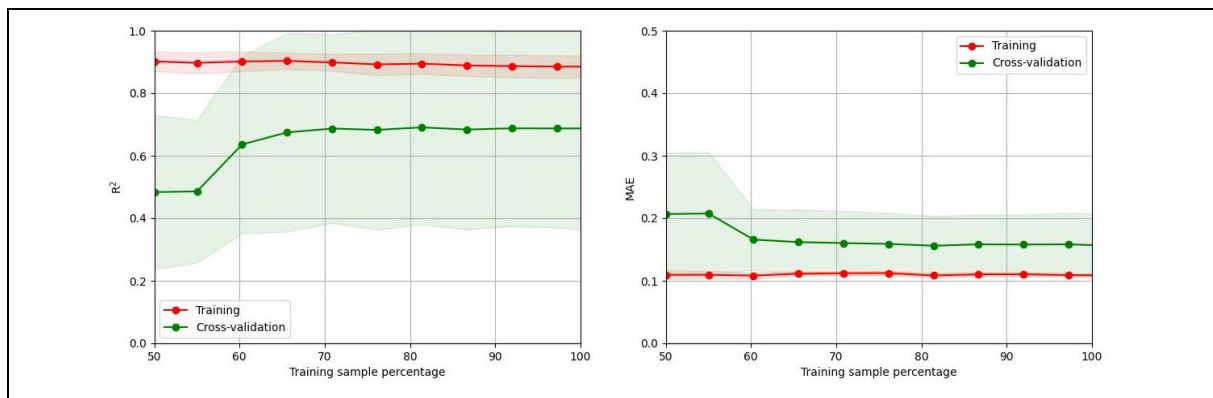

### OrthogonalMatchingPursuitCV

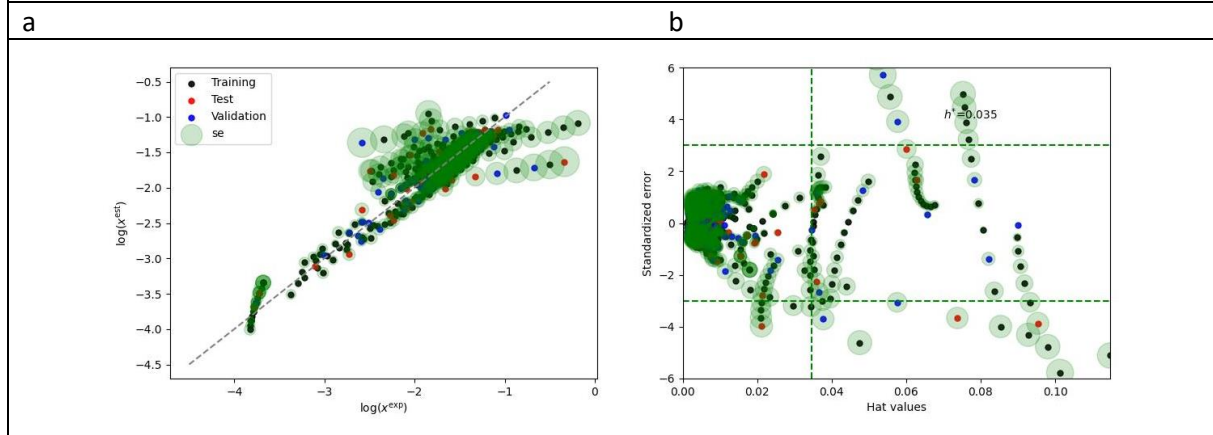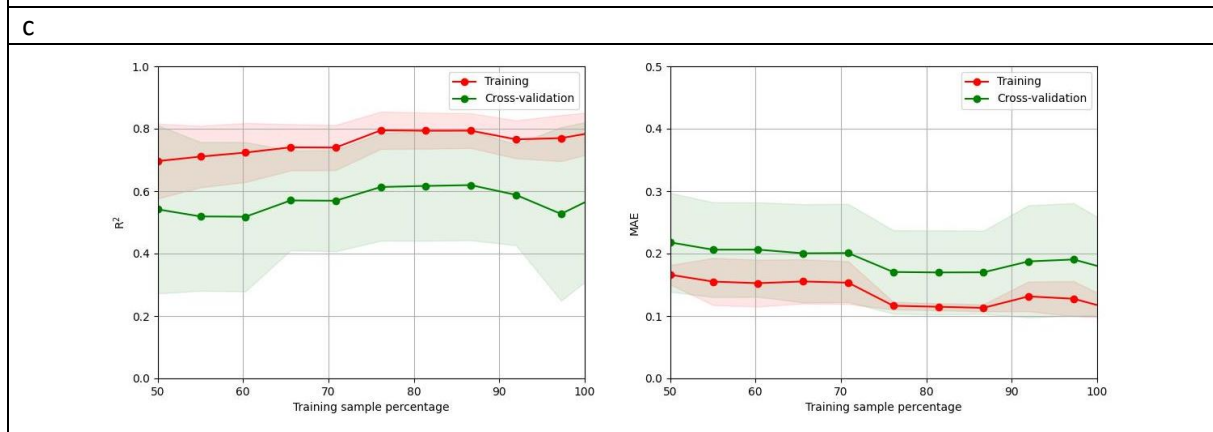

### TransformedTargetRegressor

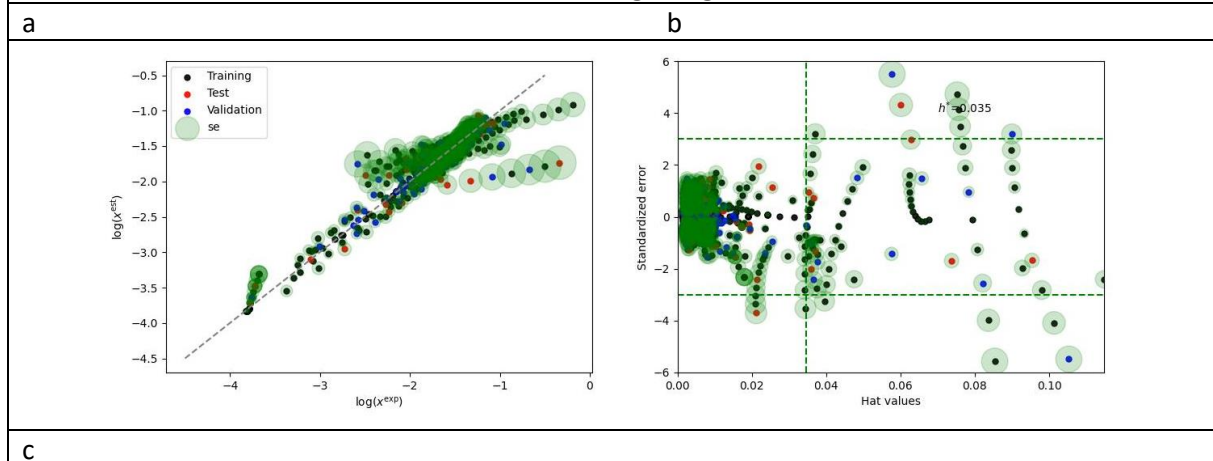

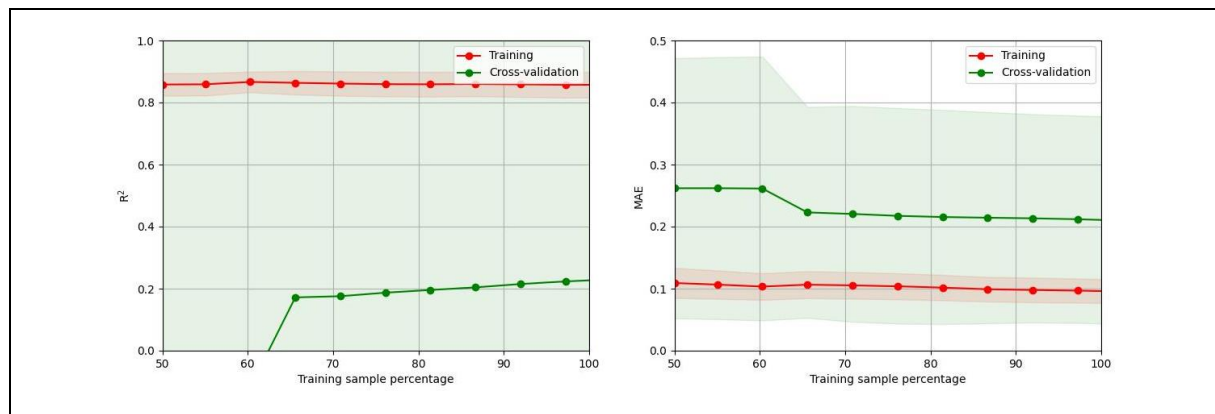

Supplement: Supplementary file 1 [file supplementary]
